# Supplementary material
Source: Royal Society of Chemistry journal article supplement (doi:10.1039/d6cp00697c)
Supplement: d6cp00697c1.pdf [file d6cp00697c1.pdf]

## Supporting Information

### Mechanistic investigation of nitridation-promoted reactivity and selectivity for propylene epoxidation in TS-1 catalysts: A theoretical study

Qiaoyun Qin,<sup>a,b</sup> Kai An,<sup>a</sup> Hongxia Liu,<sup>c</sup> Xueqiang Qi<sup>a,\*</sup> and Baohe Wang<sup>b,\*</sup>

<sup>a</sup> College of Chemistry and Chemical Engineering, Chongqing University of Technology, Chongqing, 400054, China

<sup>b</sup> Collaborative Innovation Center of Chemical Science and Engineering, Tianjin University, Tianjin 300072, China; Key Laboratory for Green Chemical Technology of Ministry of Education, R&D Center for Petrochemical Technology, Tianjin University, Tianjin 300072, China

<sup>c</sup> School of Chemistry and Chemical Engineering, Wuhan Textile University, Wuhan, 430200, China

|                                                                                                                                                                           |    |
|---------------------------------------------------------------------------------------------------------------------------------------------------------------------------|----|
| Supporting Information .....                                                                                                                                              | 1  |
| S1 Computational models.....                                                                                                                                              | 2  |
| S2 Adsorption of possible species in propylene epoxidation .....                                                                                                          | 4  |
| S3 Potential energy diagram for propylene epoxidation at the different Ti site .....                                                                                      | 5  |
| S4 Density of States (DOSs) plots of Ti- $\eta^1$ -OOH at the tetrahedral Ti site, Ti- $\eta^2$ -OOH at the Ti/defect site and Ti- $\eta^2$ -OOH on bipodal Ti site ..... | 9  |
| S5 Potential energy profiles for dissociation of H <sub>2</sub> O.....                                                                                                    | 10 |
| S6 Ring-opening of PO with different nucleophiles.....                                                                                                                    | 12 |
| S7 Formation of by-products .....                                                                                                                                         | 16 |
| S8 Calculation of thermodynamic parameters and microkinetic analysis of propylene epoxidation .....                                                                       | 24 |
| S9 Definitions of desorption barrier and PO selectivity .....                                                                                                             | 28 |
| S10 Comparison of Brønsted/Lewis acidity .....                                                                                                                            | 28 |
| Reference .....                                                                                                                                                           | 39 |

\* Corresponding author at: No. 69 Hongguang road, Banan district, Chongqing, China 400054

\*\* Corresponding author at: No. 90 Weijin Road, Nankai District, Tianjin, China 300072

E-mail address: [xqqi@cqut.edu.cn](mailto:xqqi@cqut.edu.cn) (Xueqiang Qi), [wangbh@tju.edu.cn](mailto:wangbh@tju.edu.cn) (Baohe Wang)

## S1 Computational models

### Structures of nitrated TS-1 model with tetrahedral Ti, Ti/defect and bipodal Ti sites

For TS-1 framework, there exist 12 crystallographic distinct tetrahedral sites (T-sites, and denoted as T1-T12), which are located on the ten membered ring straight pore channel ( $5.4 \times 5.6 \text{ \AA}$ ) and zigzag pore channel ( $5.1 \times 5.5 \text{ \AA}$ ), and regard as the active center for TS-1 catalyzed the epoxidation of propylene.<sup>1</sup> In order to take into account the confinement effect on the adsorption and reaction inside pores, a cluster of 86T containing the ten membered ring straight pore channel and zigzag pore channel is used to model the Ti-sites in TS-1. T10 crystallographic position was selected as the Ti site, which has been found to be the most energetically favored substitutional Ti location sites.<sup>2-9</sup> In the process of calculation, the center 16T of the 86T cluster is selected as the high level (atoms represented by balls) and treating with the high-level DFT method, while the rest of the extended framework is allocated to the low level (atoms shown in lines) and calculated using the universal force field (UFF) method. Meanwhile, the rest of the framework atoms processed by the low-level is frozen in their original lattice positions, while the atoms belonging to the central high-level is completely relaxed, as our previous calculation method.<sup>10</sup>

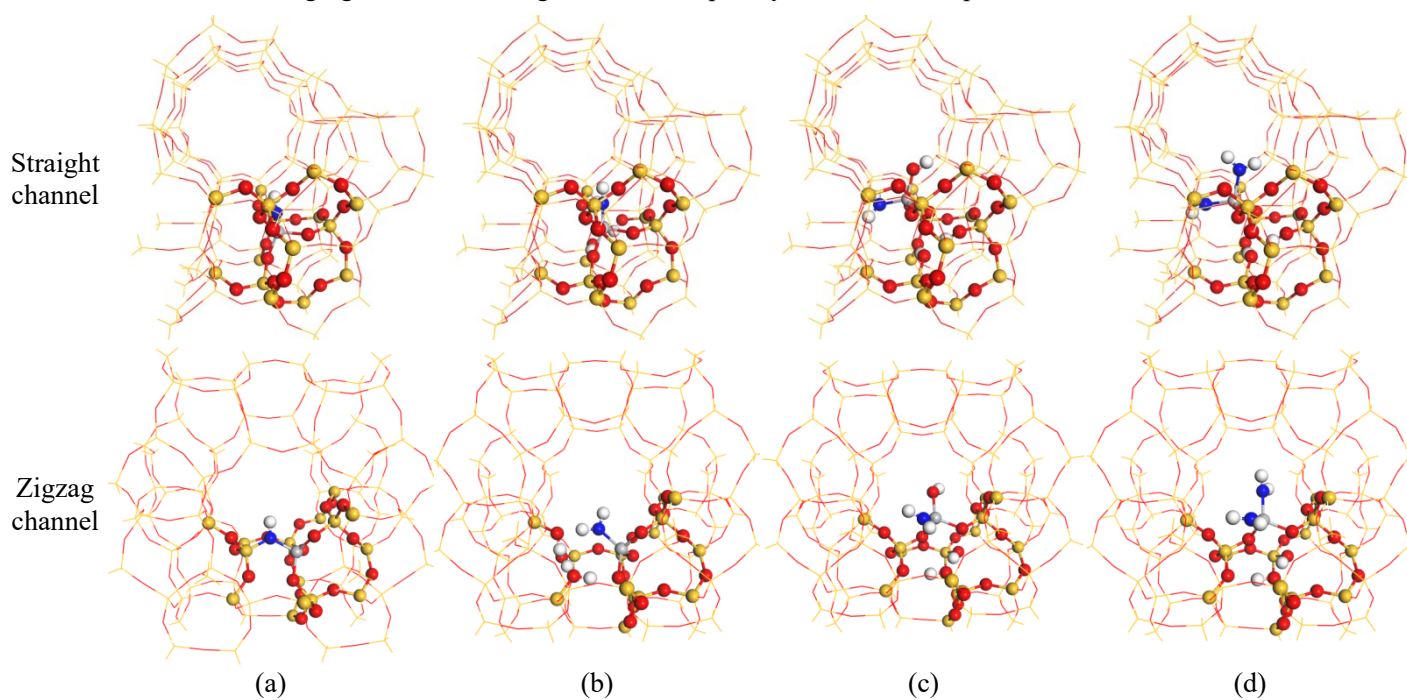

**Fig. S1** Structures of nitrated TS-1 model with (a) tetrahedral Ti, (b) Ti/defect, (c) bipodal Ti and (d) double embedded bipodal Ti sites; view along the straight channel and zigzag channel (N=blue, Ti = light gray, Si = yellow, O = red and H = white).

## TS-1 model with tetrahedral Ti, Ti/defect and bipodal Ti sites

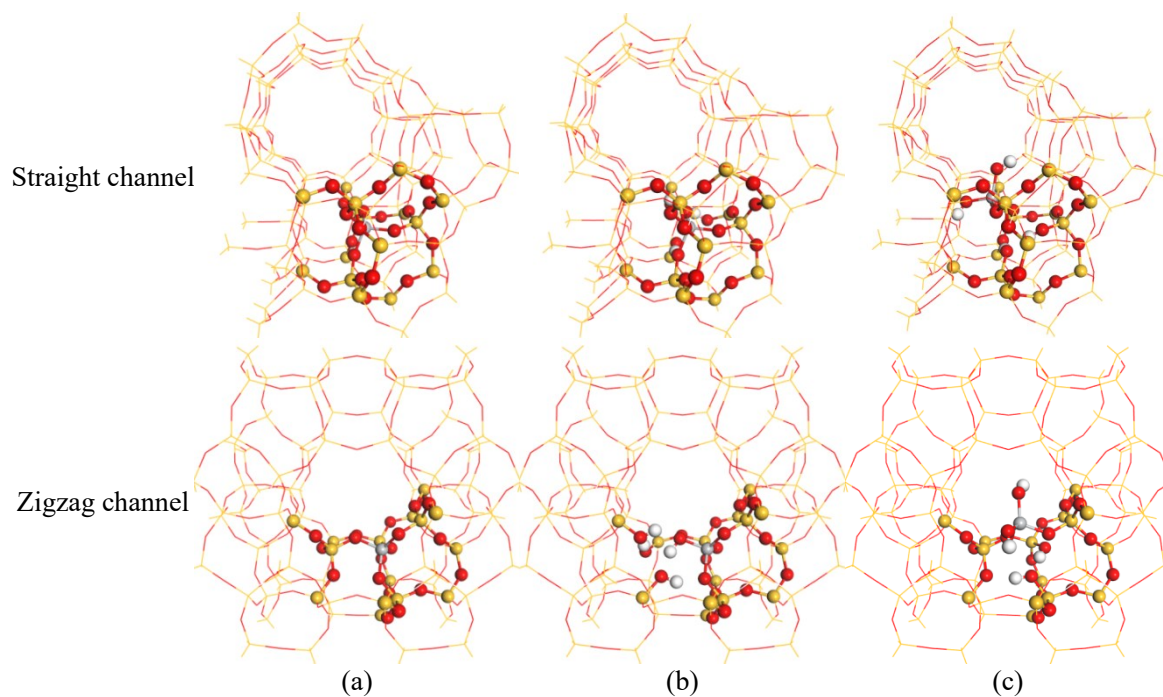

**Fig. S2** The structures of TS-1 model with (a) tetrahedral Ti, (b) Ti/defect and (c) bipodal Ti sites. View along the straight channel and zigzag channel (Ti = light gray, Si = green, O = red, and H = white).

## S2 Adsorption of possible species in propylene epoxidation

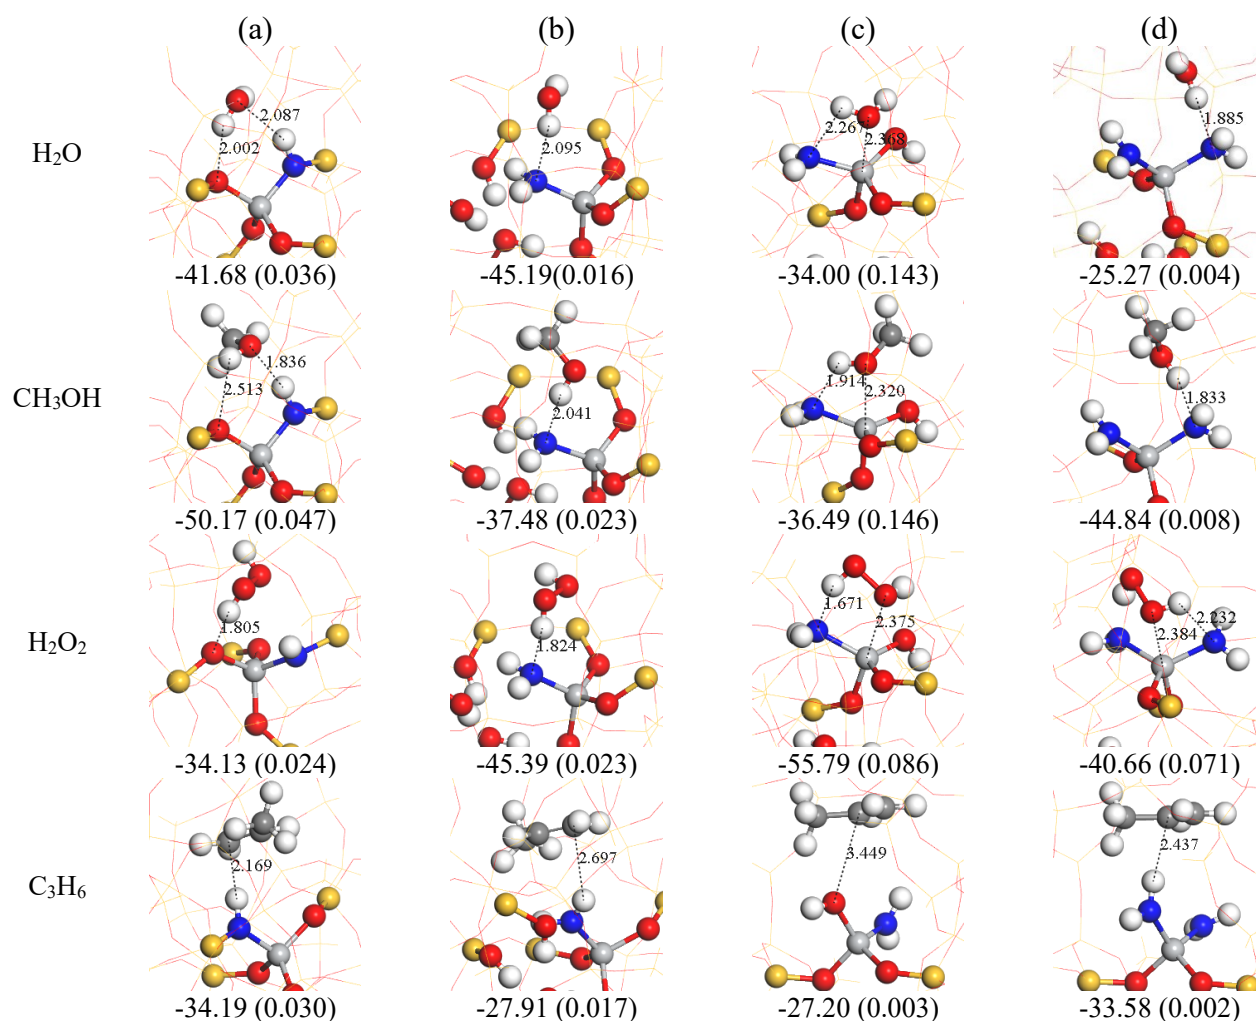

**Fig. S3** The most stable adsorption configurations of H<sub>2</sub>O, CH<sub>3</sub>OH, H<sub>2</sub>O<sub>2</sub> and C<sub>3</sub>H<sub>6</sub> PO at the nitrided (a) tetrahedral Ti, (b) Ti/defect, (c) bipodal Ti and (d) double embedded bipodal Ti sites together with the free adsorption energies at 313 K and the Mulliken charge in parenthesis. The energy unit is in kJ/mol, and bond length is in Å (N = blue, Ti = light grey, C = grey, O = red, Si = yellow and H = white).

**Table S1** Mulliken charge ( $e$ ), adsorption free energy ( $G_{\text{ads}}$ , kJ/mol) and key structural parameter of H<sub>2</sub>O, CH<sub>3</sub>OH, H<sub>2</sub>O<sub>2</sub> and C<sub>3</sub>H<sub>6</sub> adsorption at the nitrided tetrahedral Ti, Ti/defect and bipodal Ti sites as well as double embedded bipodal Ti site at 313 K and those in parenthesis at 0 K.

| Active sites        | Species                       | Mulliken charge | $G_{\text{ads}}$ (kJ/mol) | Adsorption detail |             |
|---------------------|-------------------------------|-----------------|---------------------------|-------------------|-------------|
|                     |                               |                 |                           | Modes             | Length (Å)  |
| Tetrahedral Ti site | H <sub>2</sub> O              | 0.036           | -41.68(-30.08)            | H...O/O...H       | 2.002/2.087 |
|                     | CH <sub>3</sub> OH            | 0.047           | -50.17(-29.20)            | H...O/O...H       | 2.513/1.836 |
|                     | H <sub>2</sub> O <sub>2</sub> | 0.024           | -34.13(-23.76)            | H...O             | 1.805       |
|                     | C <sub>3</sub> H <sub>6</sub> | 0.030           | -34.19(-11.04)            | C...H             | 2.169       |

|                 |                               |       |                |              |             |
|-----------------|-------------------------------|-------|----------------|--------------|-------------|
| Ti/defect site  | H <sub>2</sub> O              | 0.016 | -45.19(-35.95) | H...N        | 2.095       |
|                 | CH <sub>3</sub> OH            | 0.023 | -37.48(-25.05) | H...N        | 2.041       |
|                 | H <sub>2</sub> O <sub>2</sub> | 0.024 | -45.39(-33.91) | H...N        | 1.824       |
|                 | C <sub>3</sub> H <sub>6</sub> | 0.017 | -27.91(-8.26)  | C...H        | 2.697       |
| Bipodal Ti site | H <sub>2</sub> O              | 0.143 | -34.00(-29.71) | O...Ti/H...N | 2.368/2.267 |
|                 | CH <sub>3</sub> OH            | 0.146 | -36.49(-28.73) | O...Ti/H...N | 2.320/1.914 |
|                 | H <sub>2</sub> O <sub>2</sub> | 0.086 | -55.79(-49.13) | O...Ti/H...N | 2.375/1.671 |
|                 | C <sub>3</sub> H <sub>6</sub> | 0.003 | -27.20(-5.98)  | C...O        | 3.449       |
| Double embedded | H <sub>2</sub> O              | 0.004 | -25.27(-18.13) | H...N        | 1.885       |
|                 | CH <sub>3</sub> OH            | 0.008 | -44.84(-29.58) | H...N        | 1.833       |
| bipodal Ti site | H <sub>2</sub> O <sub>2</sub> | 0.071 | -40.66(-34.43) | O...Ti/H...N | 2.384/2.232 |
|                 | C <sub>3</sub> H <sub>6</sub> | 0.002 | -33.58(-10.64) | C...H        | 2.437       |

**Table S2** Mulliken charger ( $e$ ), adsorption free energy ( $G_{\text{ads}}$ , kJ/mol) and key structural parameter of H<sub>2</sub>O, CH<sub>3</sub>OH, H<sub>2</sub>O<sub>2</sub> and C<sub>3</sub>H<sub>6</sub> at the tetrahedral Ti, Ti/defect and bipodal Ti sites at 313 K. These calculated results are obtained from our previous studies of non-nitrided modification.

| Active sites   | Species                       | Mulliken charge ( $e$ ) | $G_{\text{ads}}$<br>(kJ/mol) | Adsorption detail |             |
|----------------|-------------------------------|-------------------------|------------------------------|-------------------|-------------|
|                |                               |                         |                              | Modes             | Length (Å)  |
| Tetrahedral Ti | H <sub>2</sub> O              | 0.026                   | -24.96                       | H...O             | 2.208       |
|                | CH <sub>3</sub> OH            | 0.027                   | -29.93                       | H...O             | 2.184       |
|                | H <sub>2</sub> O <sub>2</sub> | 0.024                   | -26.50                       | H...O             | 1.864       |
|                | C <sub>3</sub> H <sub>6</sub> | 0.020                   | -12.43                       | C...O             | 3.191       |
| Ti/defect      | H <sub>2</sub> O              | 0.150                   | -49.08                       | H...O/O...Ti      | 2.376/2.362 |
|                | CH <sub>3</sub> OH            | 0.026                   | -71.08                       | H...O             | 1.903       |
|                | H <sub>2</sub> O <sub>2</sub> | 0.120                   | -48.18                       | H...O/O...Ti      | 1.764/2.356 |
|                | C <sub>3</sub> H <sub>6</sub> | 0.023                   | -13.44                       | C...O             | 3.032       |
| Bipodal Ti     | H <sub>2</sub> O              | 0.182                   | -43.30                       | O...Ti            | 2.245       |
|                | CH <sub>3</sub> OH            | 0.169                   | -52.93                       | H...O/O...Ti      | 2.065/2.288 |
|                | H <sub>2</sub> O <sub>2</sub> | 0.111                   | -55.65                       | H...O/O...Ti      | 1.708/2.356 |
|                | C <sub>3</sub> H <sub>6</sub> | 0.007                   | -44.68                       | C...O             | 3.410       |

### S3 Potential energy diagram for propylene epoxidation at the different Ti site

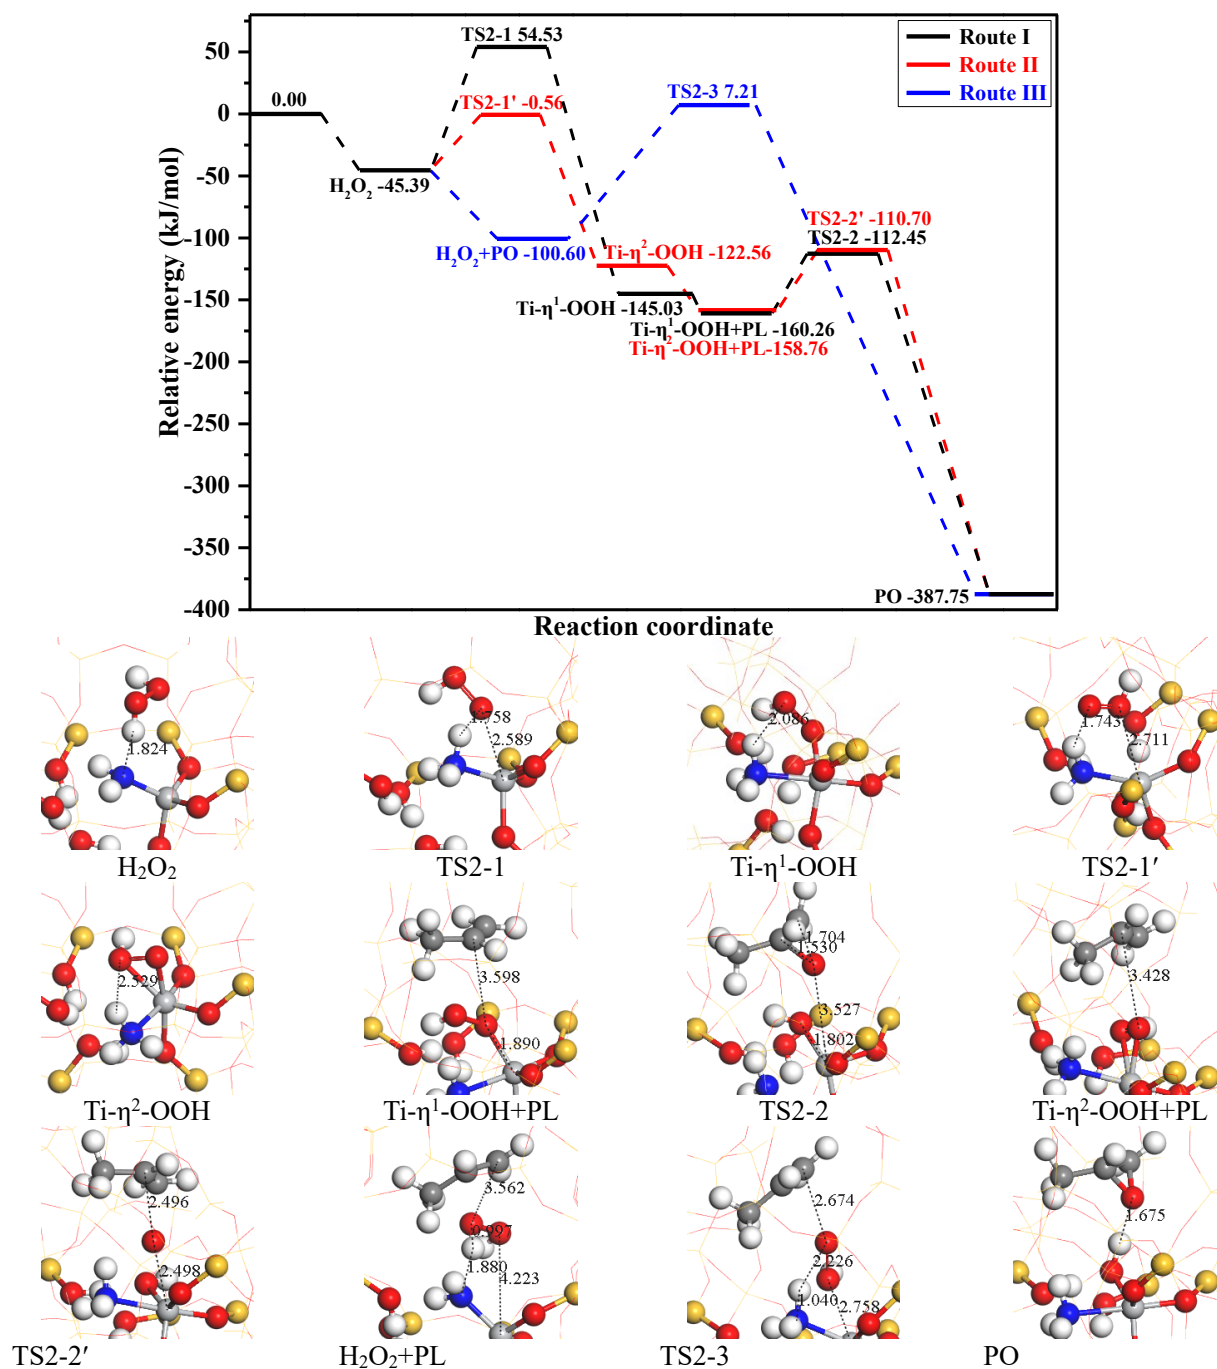

**Fig. S4** Relative energy profiles for three routes of propylene epoxidation at the nitrided Ti/defect site at 313 K, together with the structures of reactant, transition state, intermediate and product. Route I, the “two-step” mechanism *via*  $\text{Ti}-\eta^1\text{-OOH}$  intermediate; Route II, the “two-step” mechanism *via*  $\text{Ti}-\eta^2\text{-OOH}$  intermediate; Route III, the “one-step” mechanism. The energy unit is in kJ/mol, and bond length is in Å (N = blue, Ti = light grey, C = grey, O = red, Si = yellow and H = white).

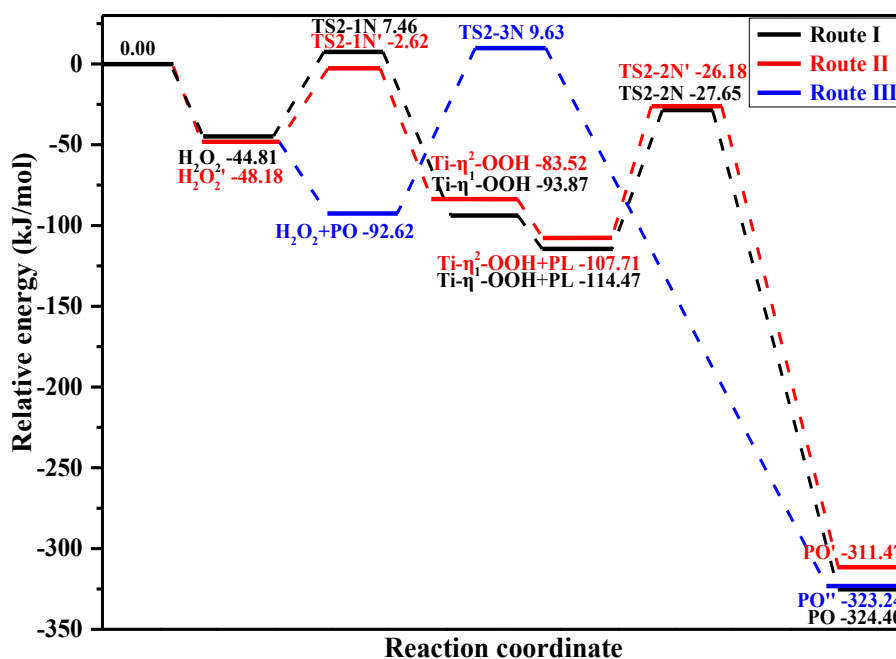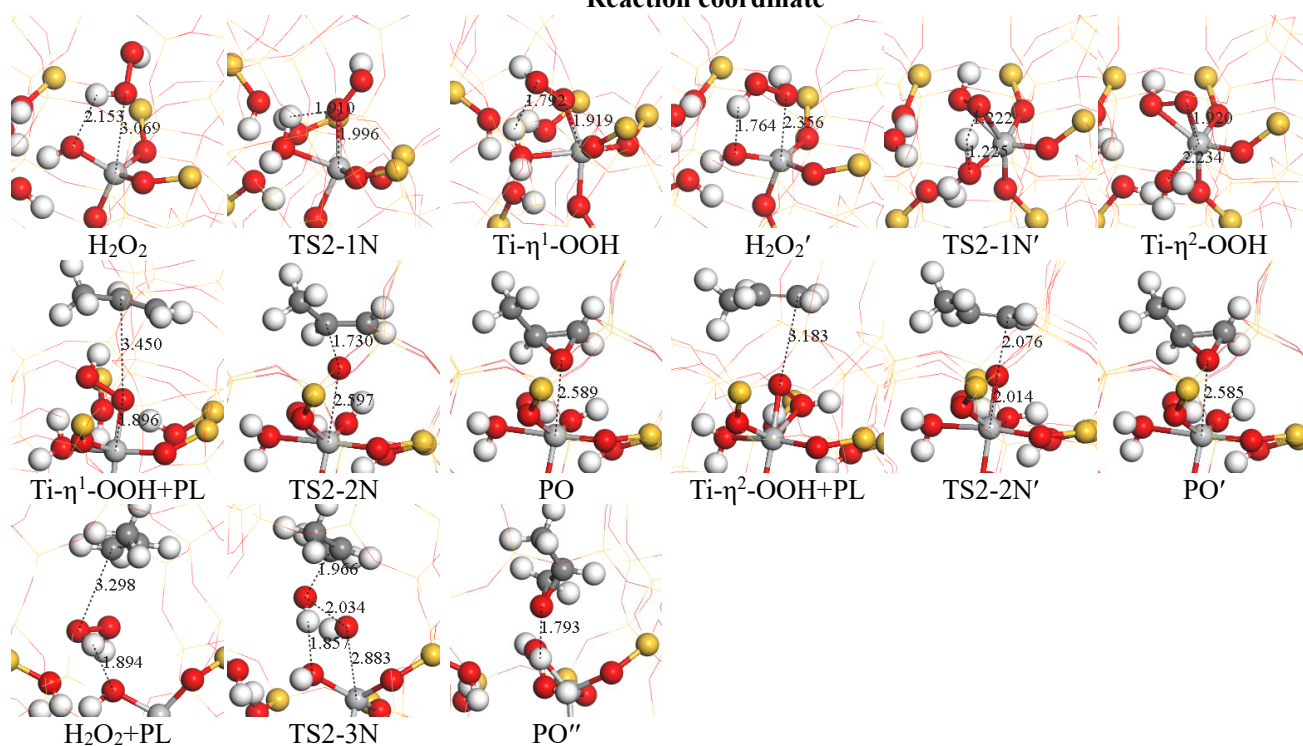

**Fig. S5** Relative energy profiles for three routes of propylene epoxidation at the Ti/defect site at 313 K, together with the structures of reactant, transition state, intermediate and product. Route I, the “two-step” mechanism *via*  $\text{Ti-}\eta^1\text{-OOH}$  intermediate; Route II, the “two-step” mechanism *via*  $\text{Ti-}\eta^2\text{-OOH}$  intermediate; Route III, the “one-step” mechanism. The energy unit is in kJ/mol, and bond length is in Å. (Ti = light grey, C = grey, O = red, Si = yellow, H = white).

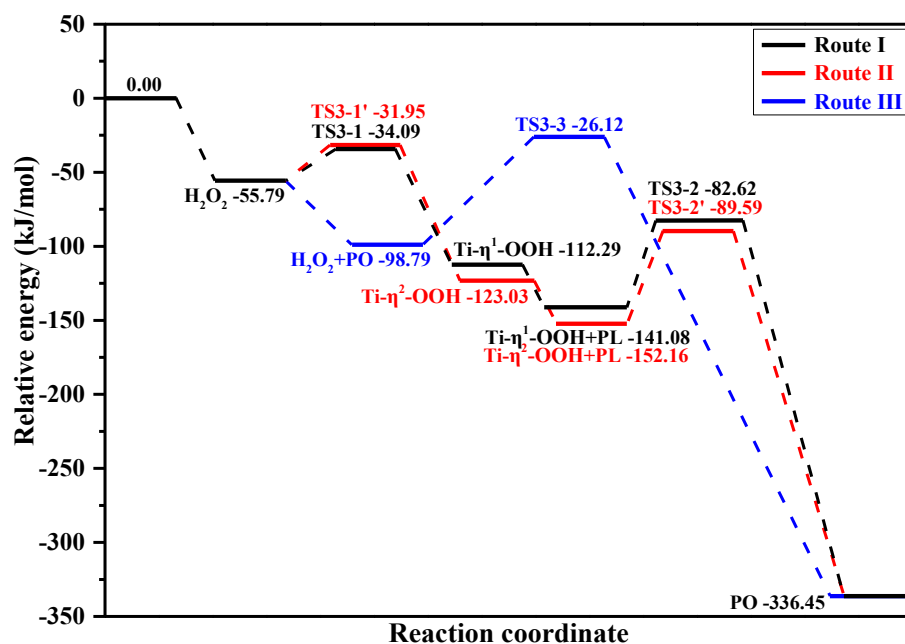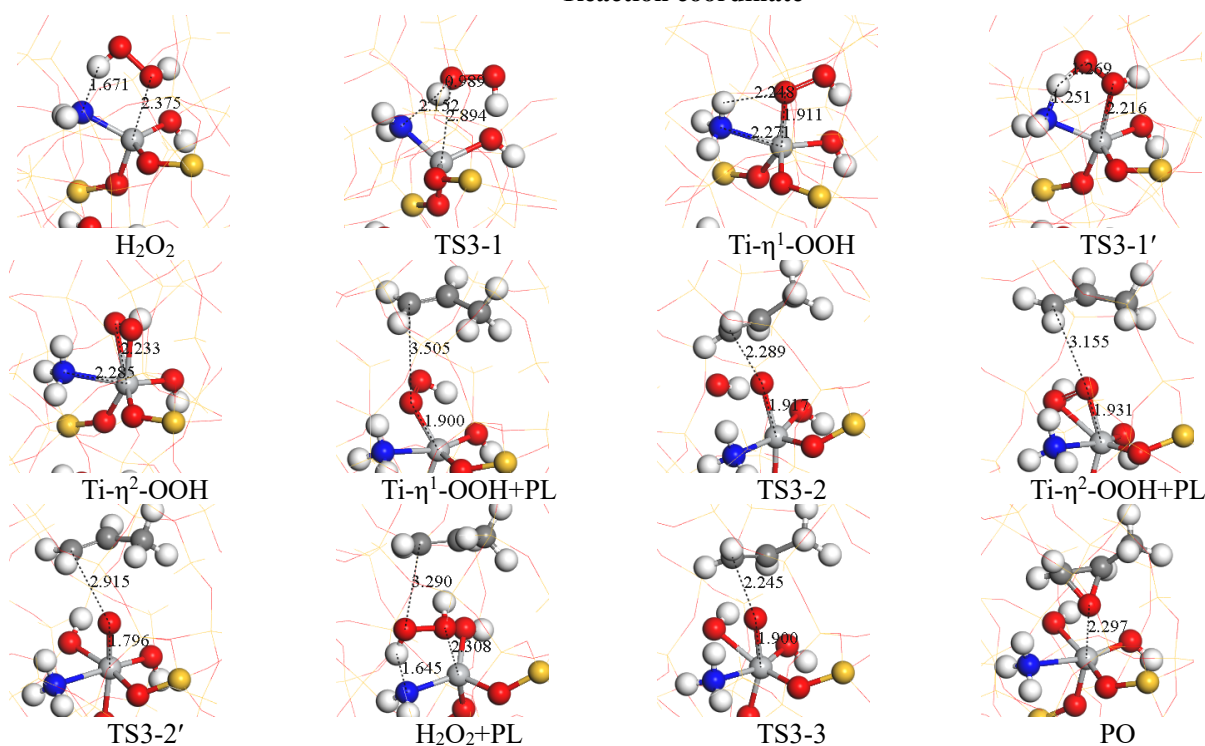

**Fig. S6** Relative energy profiles for three routes of propylene epoxidation at nitrated bipodal Ti site at 313 K, together with the structures of reactant, transition state, intermediate and product. Route I, the “two-step” mechanism *via* Ti-η<sup>1</sup>-OOH intermediate; Route II, the “two-step” mechanism *via* Ti-η<sup>2</sup>-OOH intermediate; Route III, the “one-step” mechanism. The energy unit is in kJ/mol, and bond length is in Å (N = blue, Ti = light grey, C = grey, O = red, Si = yellow and H = white).

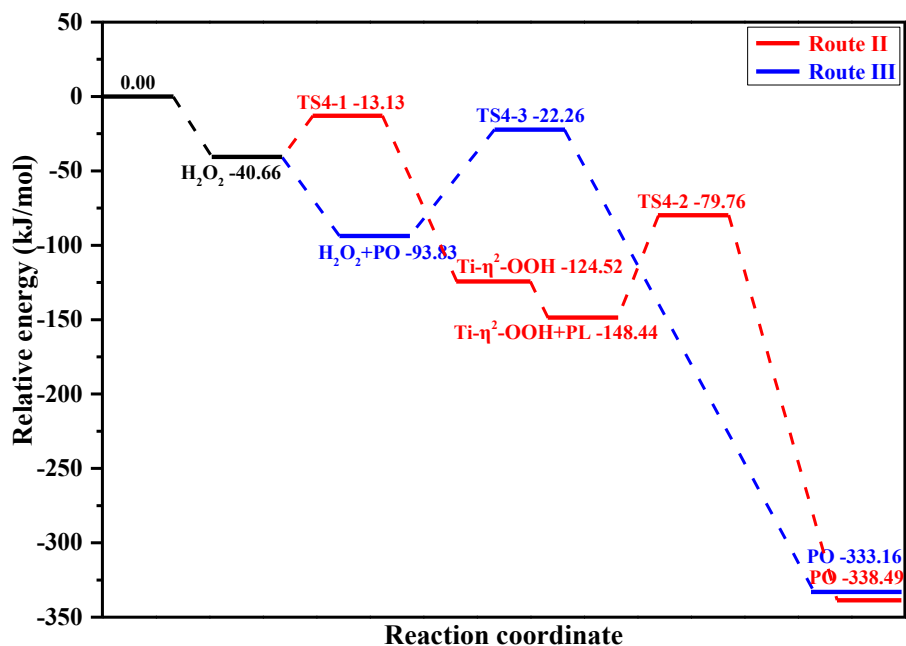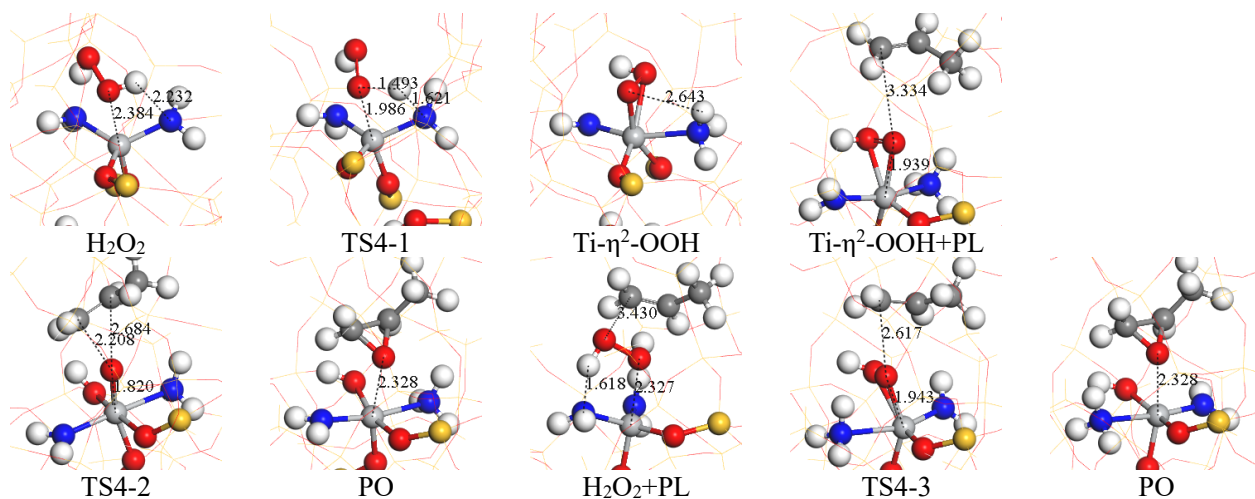

**Fig. S7** Relative energy profiles for three routes of propylene epoxidation at the double embedded bipodal Ti site at 313 K, together with the structures of reactant, transition state, intermediate and product. Route II, the “two-step” mechanism *via* Ti-η<sup>2</sup>-OOH intermediate; Route III, the “one-step” mechanism. The energy unit is in kJ/mol, and bond length is in Å. (Ti = light grey, C = grey, O = red, Si = yellow, H = white).

**S4 Density of States (DOSs) plots of Ti- $\eta^1$ -OOH at the tetrahedral Ti site, Ti- $\eta^2$ -OOH at the Ti/defect site and Ti- $\eta^2$ -OOH on bipodal Ti site**

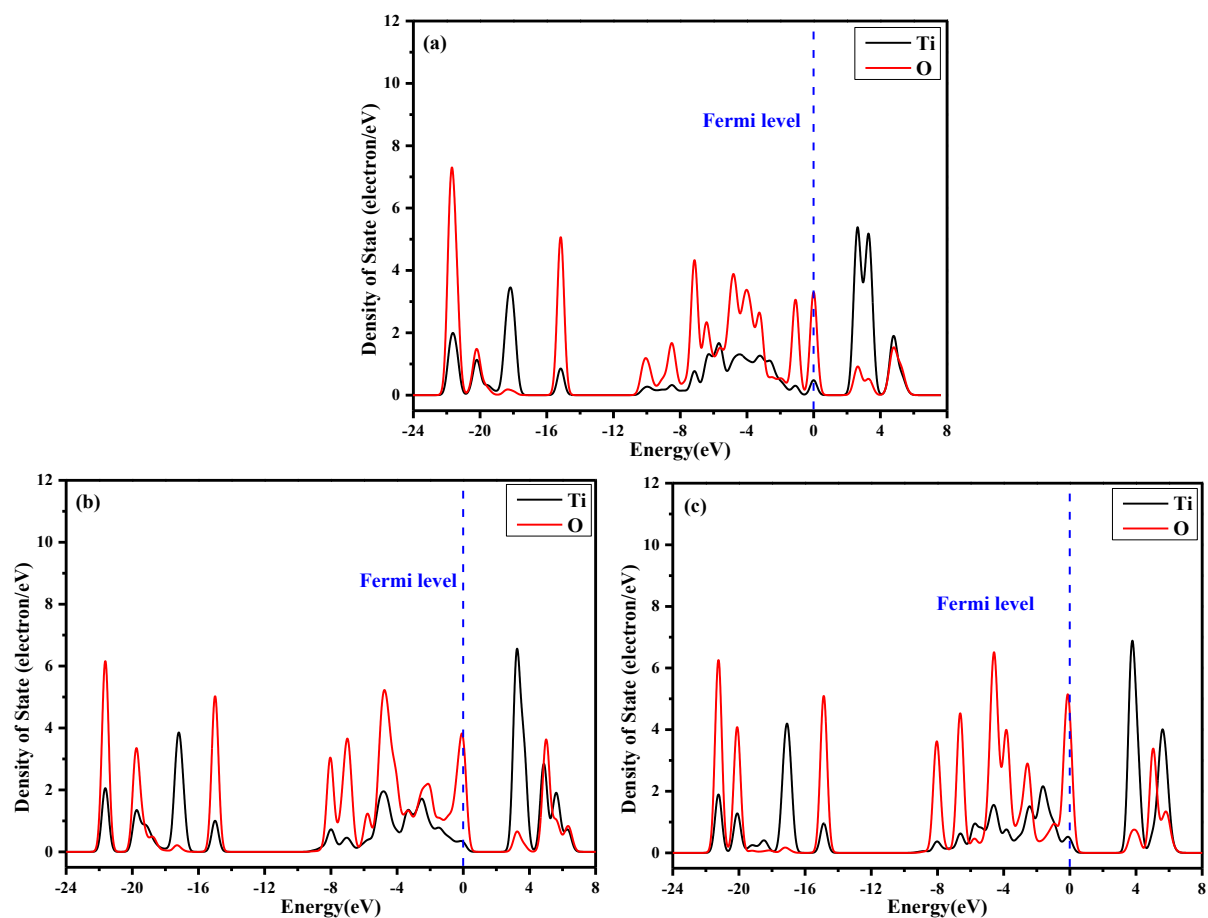

**Fig. S8** The density of states (DOSs) plots of (a) Ti- $\eta^1$ -OOH at the tetrahedral Ti site; (b) Ti- $\eta^2$ -OOH on the Ti/defect site; (c) Ti- $\eta^2$ -OOH on the bipodal Ti site.

## S5 Potential energy profiles for dissociation of H<sub>2</sub>O

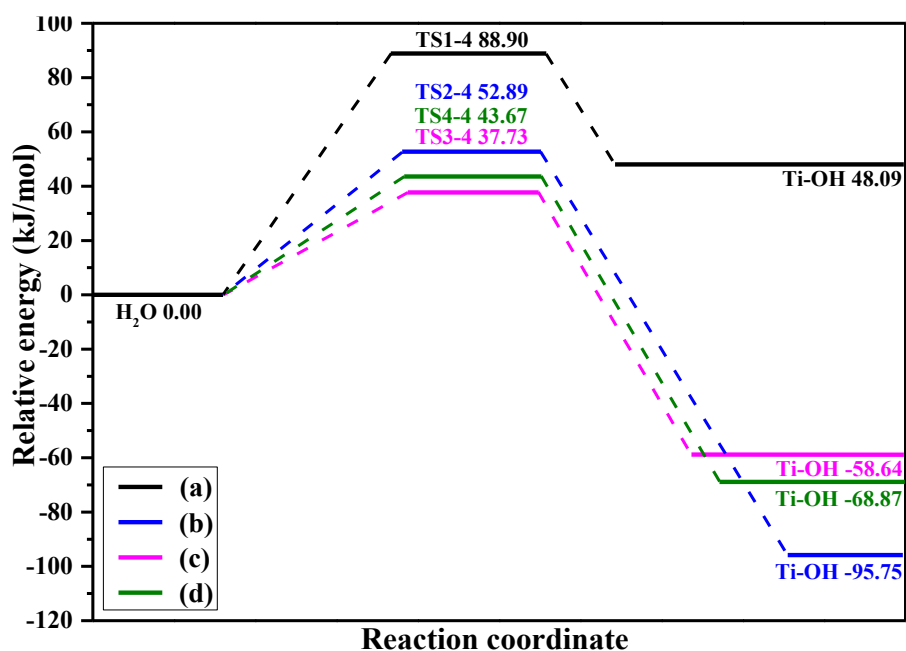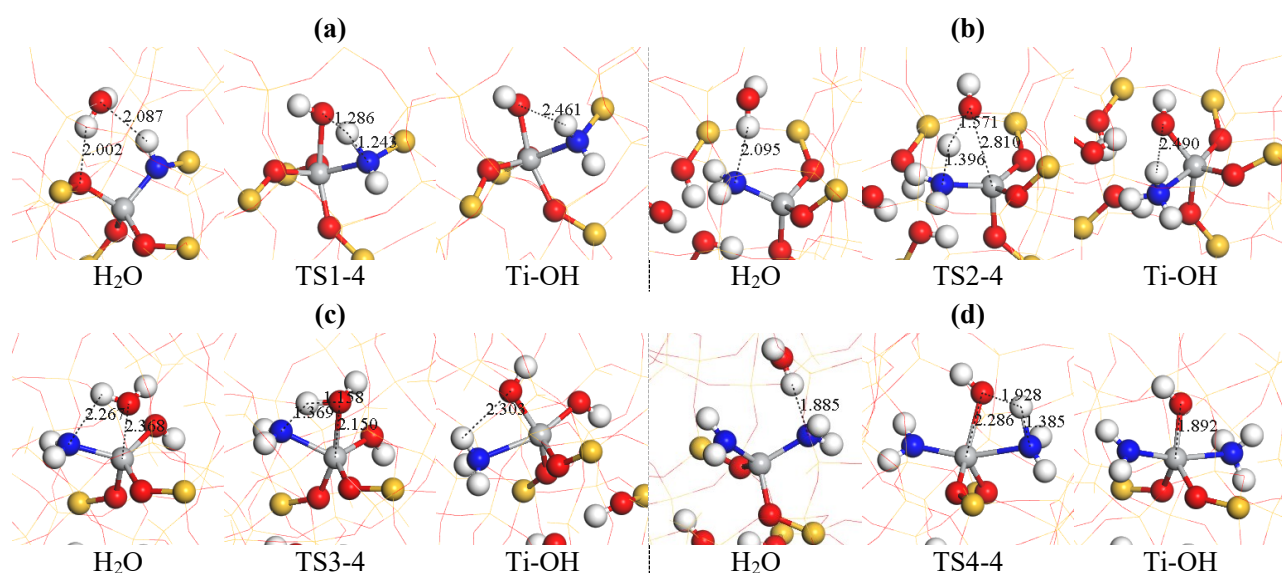

**Fig. S9** Potential energy profiles for dissociation of H<sub>2</sub>O, together with the structures of reactant, transition state and product at the nitrated (a) tetrahedral Ti, (b) Ti/defect, (c) bipodal Ti and (d) double embedded bipodal Ti sites at 313 K; The bond length is in Å (N = blue, Ti = light grey, C = grey, O = red, Si = yellow and H = white).

In HPPO, the adsorbed H<sub>2</sub>O and H<sub>2</sub>O<sub>2</sub> may decompose to form the corresponding HO- and HOO- groups, wherein the bond of H-O will break in the adsorbed molecules. The dissociation of H<sub>2</sub>O<sub>2</sub> have been investigated in section of propylene epoxidation, therefore, only the dissociation of H<sub>2</sub>O is investigated here. At tetrahedral Ti site, the dissociations are initiated by adsorptions of H<sub>2</sub>O. Then, the dissociation processed *via* TS1-4, in which the transfer of H to the Ti-NH-Si group occurs concurrently with the formation of the O-Ti bonds. As a result, H<sub>2</sub>O dissociated leading to the formation of Ti-NH<sub>2</sub>-Si, Ti-OH groups, and the calculated activation free energies and

reaction free energies are 88.90 and 48.09 kJ/mol, correspondingly. Similarly, at Ti/defect and bipodal Ti sites, the dissociations are also initiated by adsorptions of H<sub>2</sub>O, and then the transfer of H to the Ti-NH<sub>2</sub> group occurs concurrently with the formation of the O-Ti bonds. As a result, H<sub>2</sub>O dissociated leading to the formation of Ti-NH<sub>3</sub> and Ti-OH groups, the calculated activation free energies are 52.89, 37.73 and 43.67 kJ/mol, and correspondingly reaction free energies are -95.75, -58.64 and -68.87 kJ/mol.

## S6 Ring-opening of PO with different nucleophiles

**Table S3** Mulliken charge ( $e$ ), adsorption free energy ( $G_{\text{ads}}$ , kJ/mol) and key structural parameter of PO at the different nucleophiles at 313 K and those in parenthesis at 0 K.

| Active sites                    | Nucleophiles       | Mulliken charge ( $e$ ) | $G_{\text{ads}}$ (kJ/mol) | Adsorption detail |            |
|---------------------------------|--------------------|-------------------------|---------------------------|-------------------|------------|
|                                 |                    |                         |                           | Mode              | Length (Å) |
| Tetrahedral Ti site             | Ti-N(H)-Si         | 0.042                   | -70.96(-49.96)            | O...H             | 1.809      |
|                                 | Ti-OH              | 0.036                   | -64.79(-43.60)            | O...H             | 2.278      |
|                                 | Ti- $\eta^1$ -OOH  | 0.014                   | -52.74(-29.05)            | O...H             | 2.135      |
|                                 | Si-N(H)-Si         | 0.036                   | -69.44(-49.17)            | O...H             | 1.804      |
| Ti/defect site                  | Ti-NH <sub>2</sub> | 0.016                   | -58.03(-36.31)            | O...H             | 1.900      |
|                                 | Ti-OH              | 0.052                   | -39.36(-19.43)            | O...H             | 1.675      |
|                                 | Ti- $\eta^1$ -OOH  | 0.015                   | -39.81(-21.80)            | O...H             | 1.702      |
|                                 | Ti- $\eta^2$ -OOH  | 0.015                   | -68.12(-47.80)            | O...H             | 2.526      |
|                                 | Si-NH <sub>2</sub> | 0.005                   | -56.46(-32.05)            | O...H             | 2.111      |
| Bipodal Ti site                 | Ti-NH <sub>2</sub> | 0.171                   | -42.97(-32.50)            | O...Ti            | 2.244      |
|                                 | Ti-OH              | 0.033                   | -40.72(-30.17)            | O...H             | 1.749      |
|                                 | Ti-OH'             | 0.123                   | -44.08(-33.52)            | O...Ti            | 2.411      |
|                                 | Ti- $\eta^1$ -OOH  | 0.017                   | -46.24(-27.96)            | O...H             | 2.056      |
|                                 | Ti- $\eta^2$ -OOH  | 0.054                   | -48.67(-34.95)            | O...H             | 1.680      |
| Double embedded bipodal Ti site | Ti-NH <sub>2</sub> | 0.027                   | -39.03(-23.60)            | O...H             | 1.859      |
|                                 | Ti-OH              | 0.017                   | -47.49(-30.52)            | O...H             | 1.871      |
|                                 | Ti-OH'             | 0.131                   | -42.26(-28.69)            | O...H             | 2.328      |
|                                 | Ti- $\eta^2$ -OOH  | 0.059                   | -30.59(-17.14)            | O...H             | 1.626      |

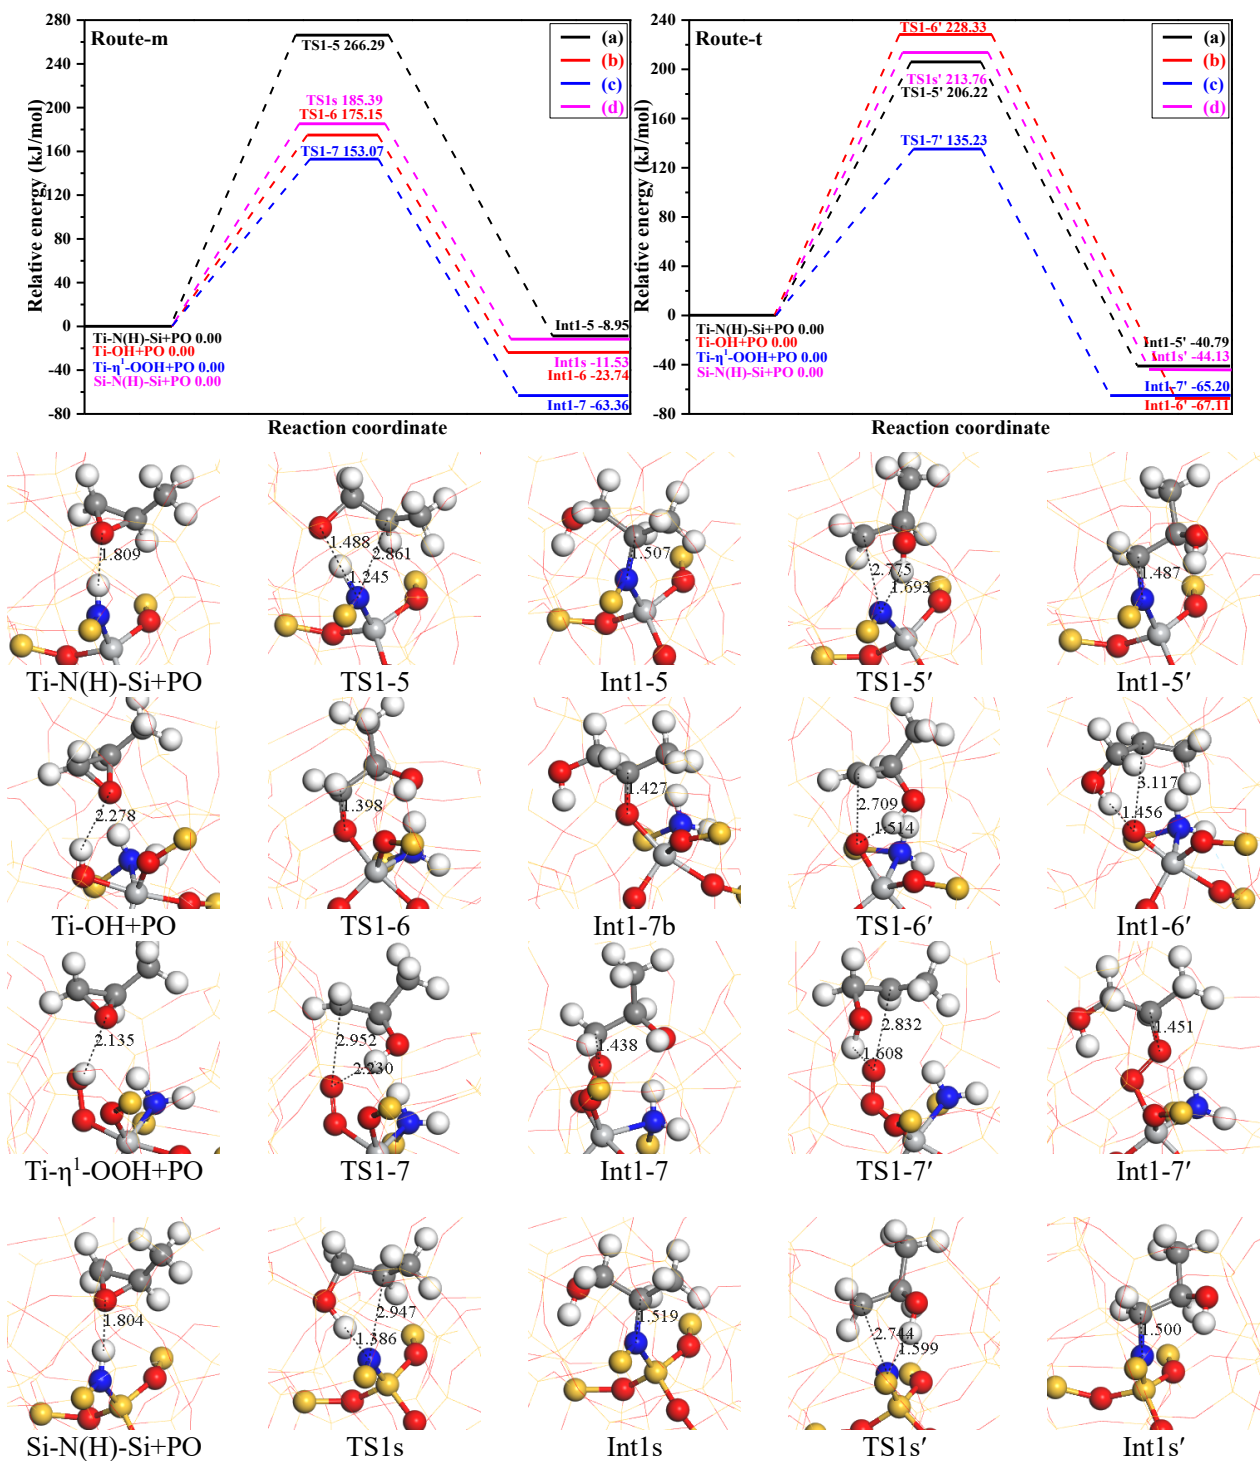

**Fig. S10** Potential energy profiles of ring-opening of PO with (a) Ti-N(H)-Si, (b) Ti-OH, (c) Ti- $\eta^1$ -OOH and (d) Si-N(H)-Si, as well as the structures of reactant, transition state and product at the nitrated tetrahedral Ti site at 313 K; The bond length is in Å (N = blue, Ti = light grey, C = grey, O = red, Si = yellow and H = white).

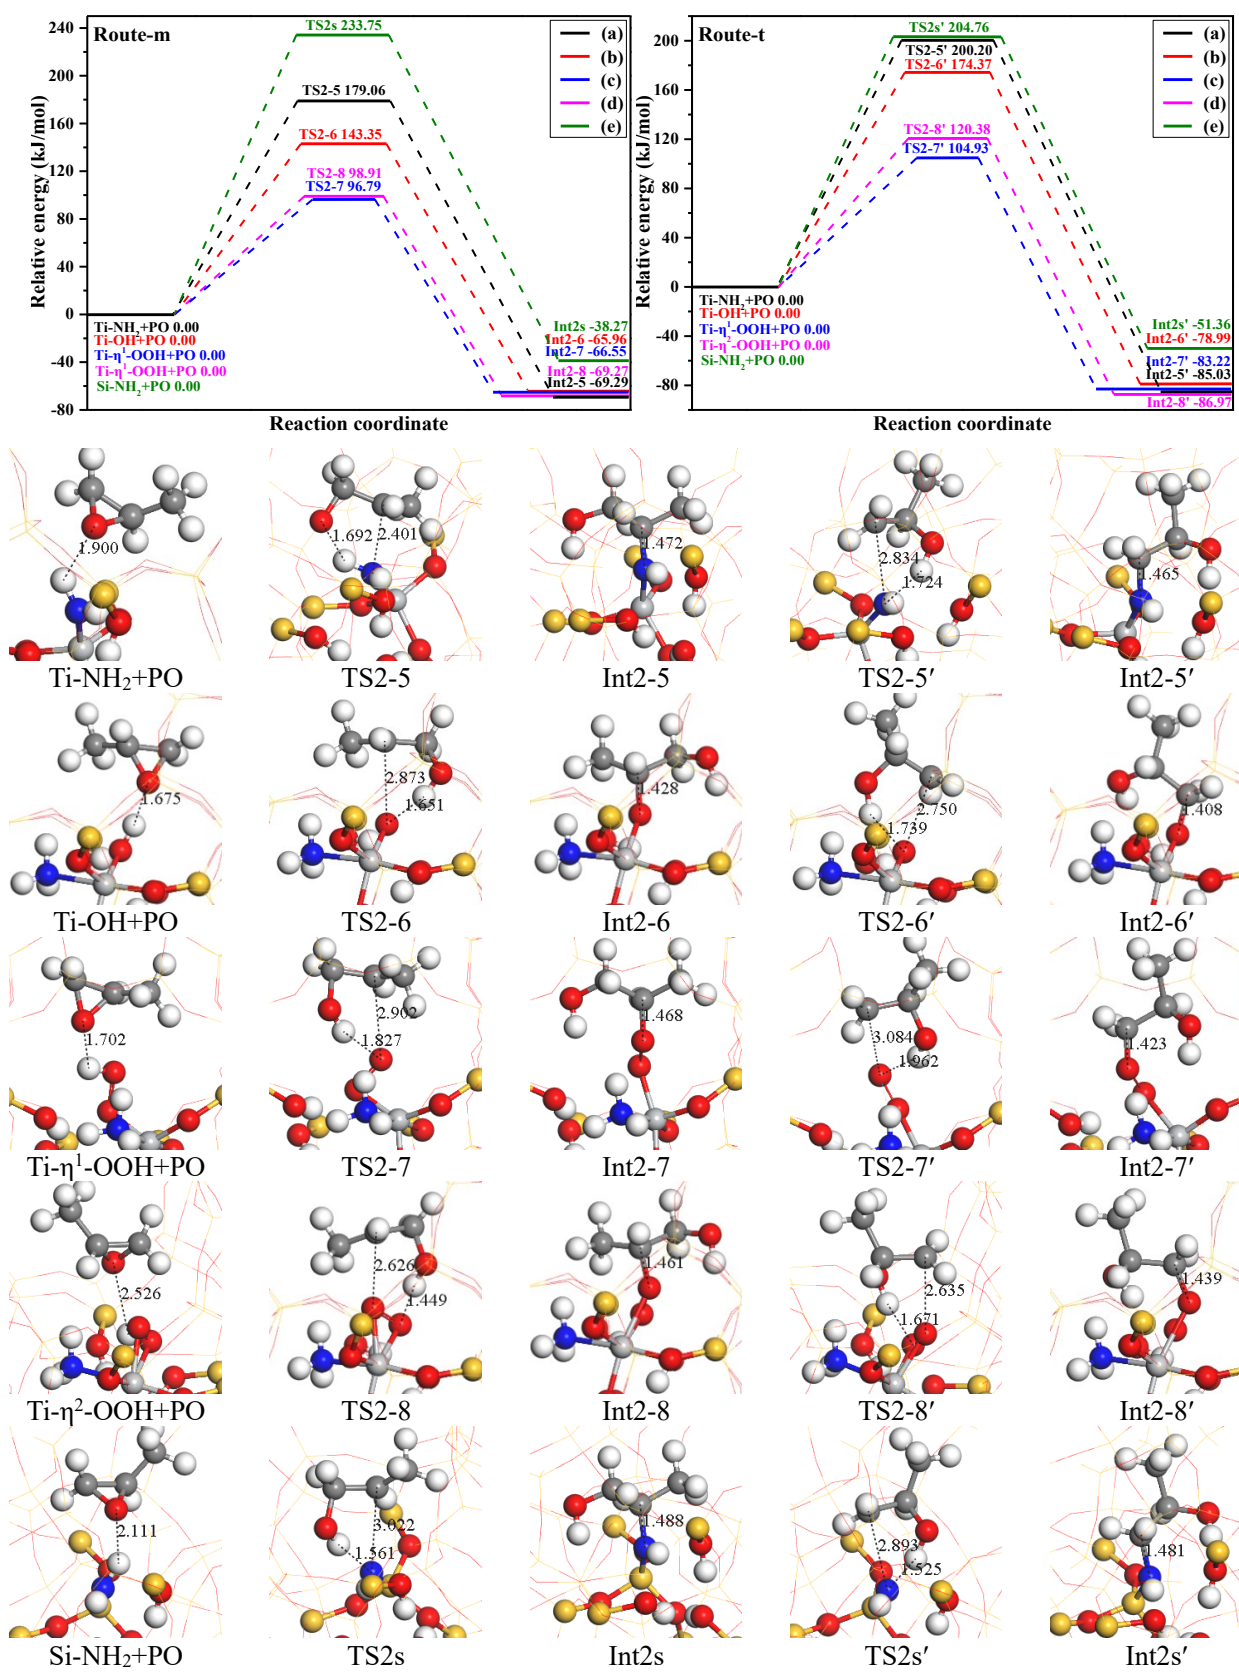

**Fig. S11** Potential energy profiles of ring-opening of PO with (a) Ti-NH<sub>2</sub>, (b) Ti-OH, (c) Ti-η<sup>1</sup>-OOH, (d) Ti-η<sup>2</sup>-OOH and (e) Si-NH<sub>2</sub>, as well as the structures of reactant, transition state and product at the nitrated Ti/defect site at 313 K; The bond length is in Å (N = blue, Ti = light grey, C = grey, O = red, Si = yellow and H = white).

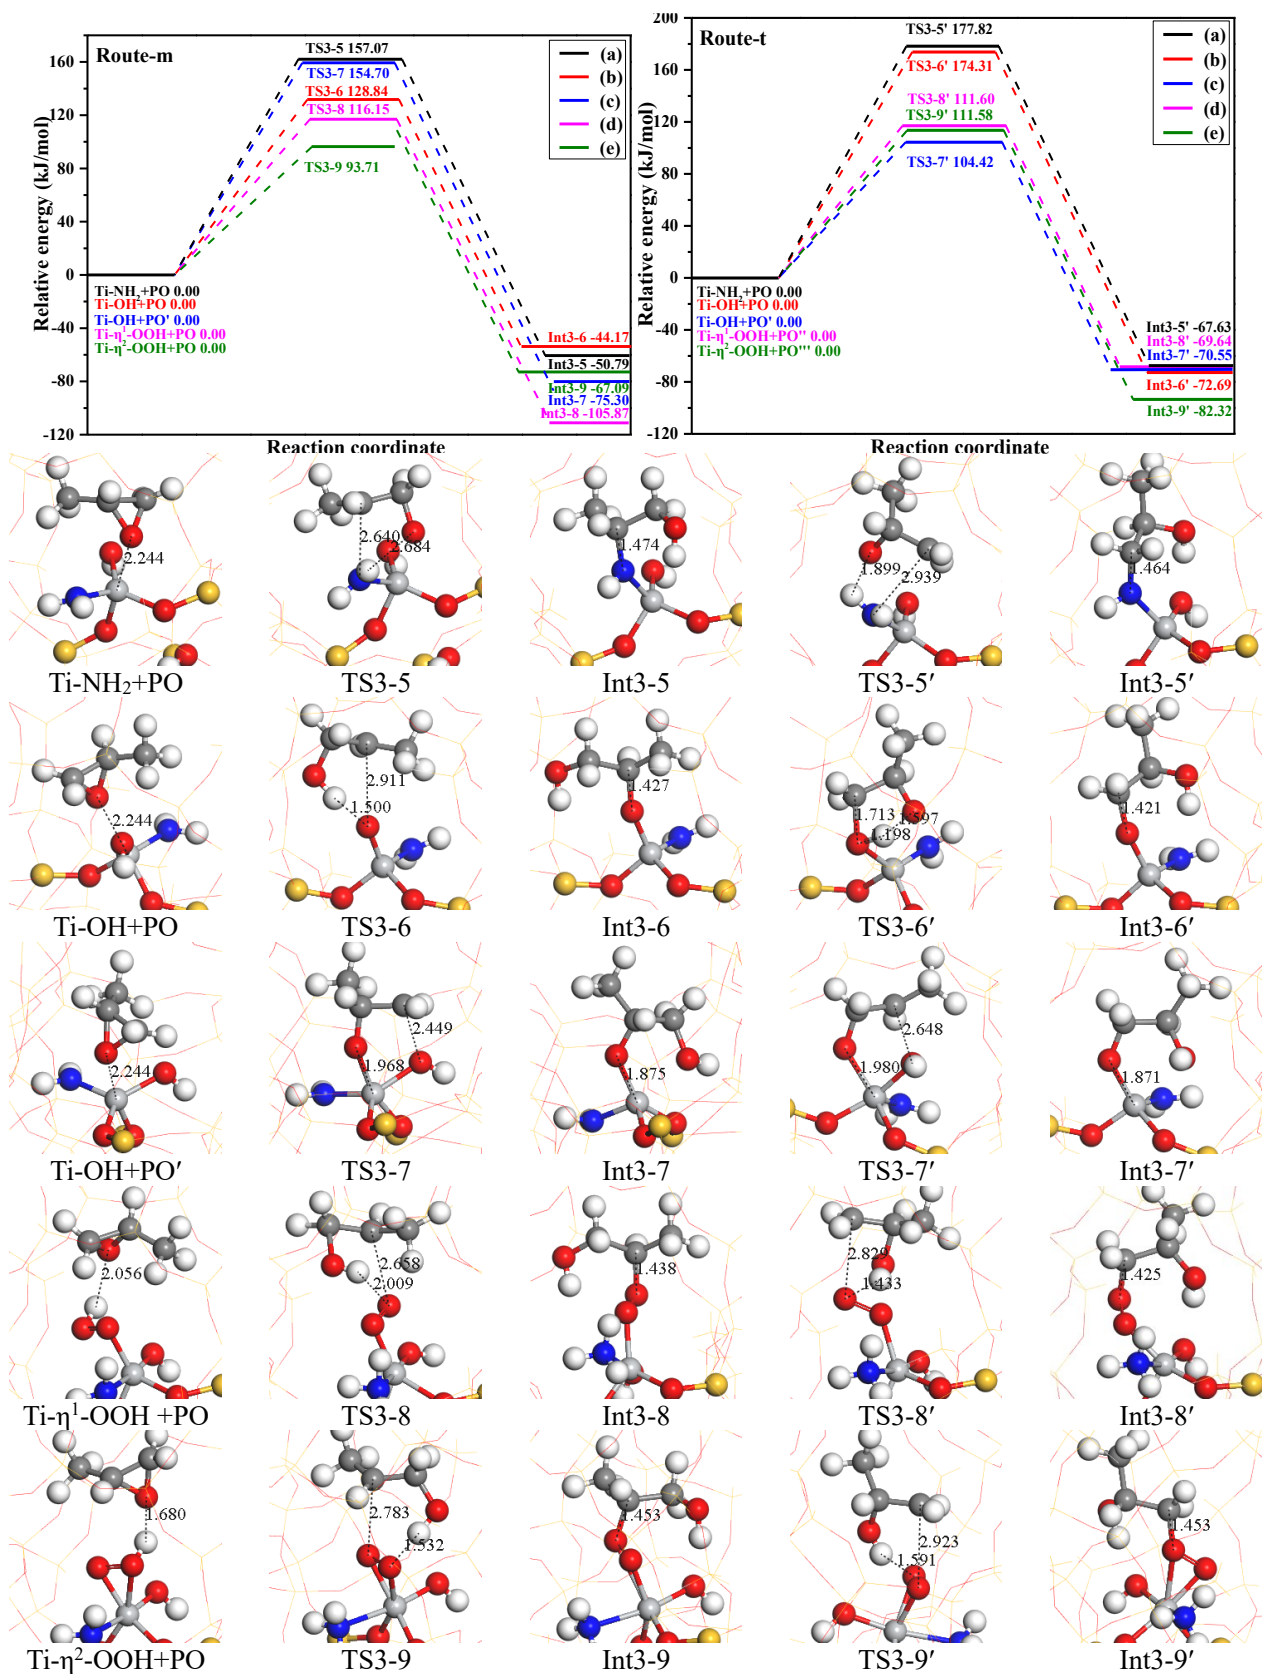

**Fig. S12** Potential energy profiles of ring-opening of PO with (a) Ti-NH<sub>2</sub>, (b) c) Ti-OH, (d) Ti-η<sup>1</sup>-OOH and (e) Ti-η<sup>2</sup>-OOH, as well as the structures of reactant, transition state and product at the nitrated bipodal Ti site at 313 K; The bond length is in Å (N = blue, Ti = light grey, C = grey, O = red, Si = yellow and H = white).

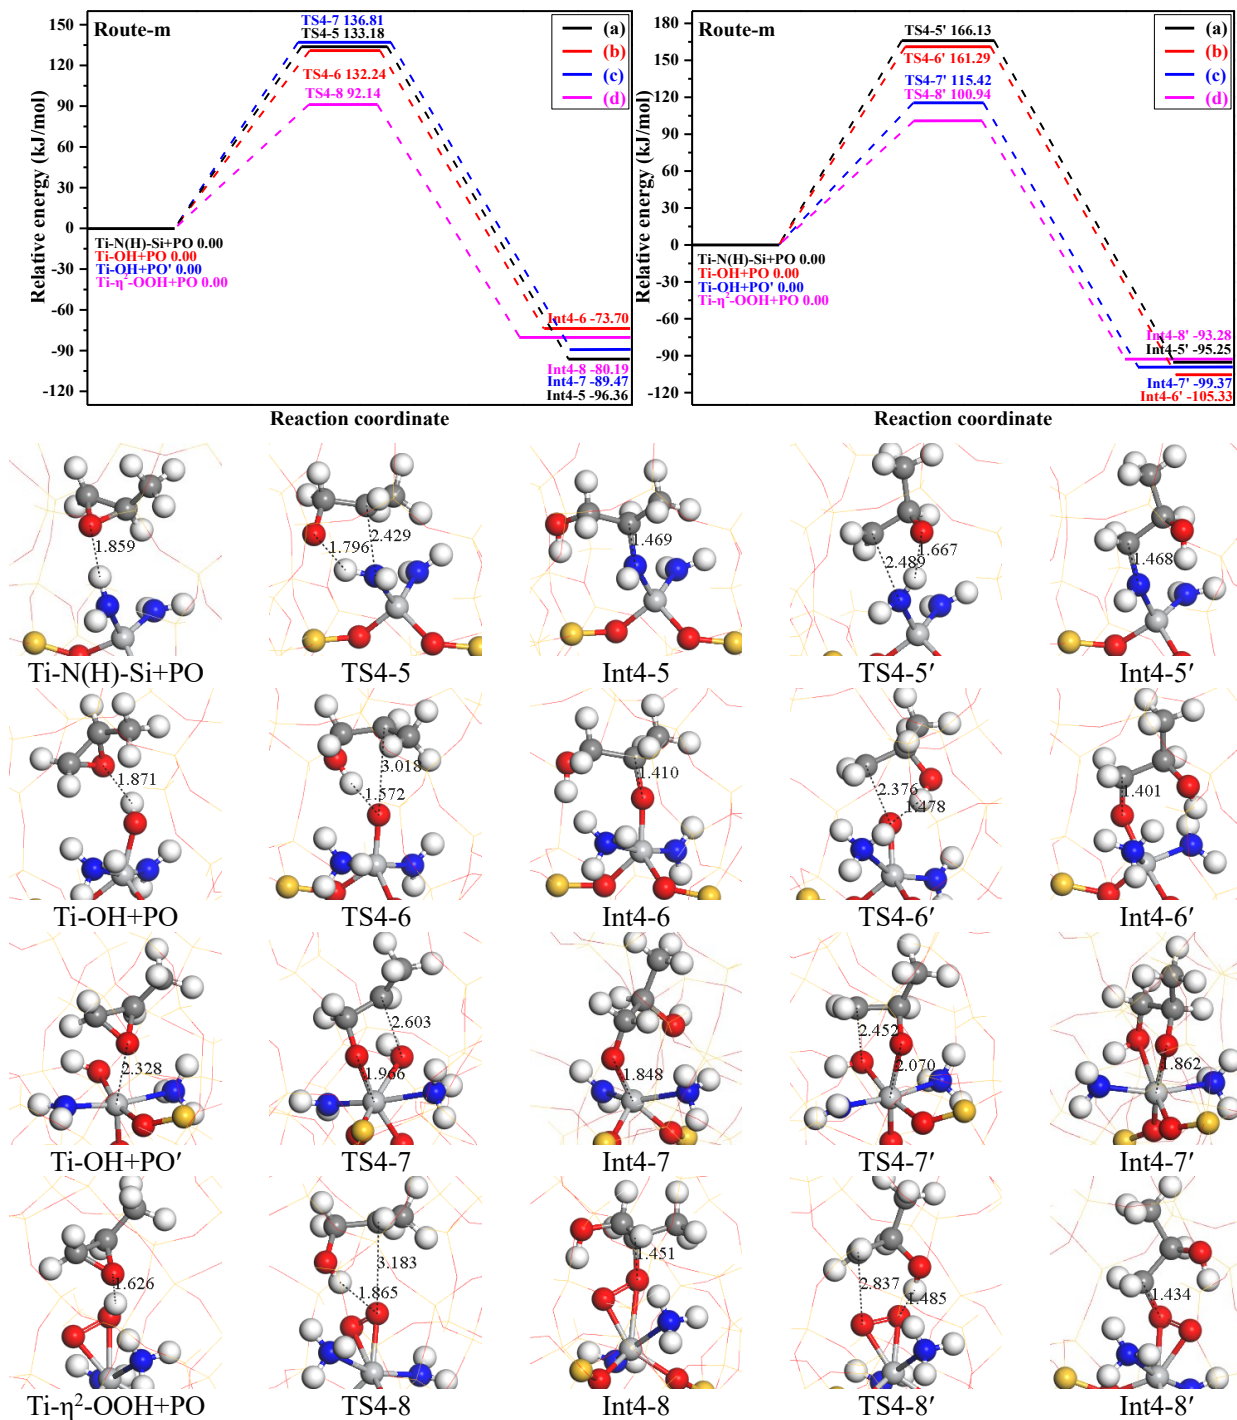

**Fig. S13** Potential energy profiles of ring-opening of PO with (a) Ti-N(H)-Si, (b~c) Ti-OH and (d) Ti-η<sup>2</sup>-OOH, as well as the structures of reactant, transition state and product at the nitrated double embedded bipodal Ti site at 313 K; The bond length is in Å (N = blue, Ti = light grey, C = grey, O = red, Si = yellow and H = white).

## S7 Formation of by-products

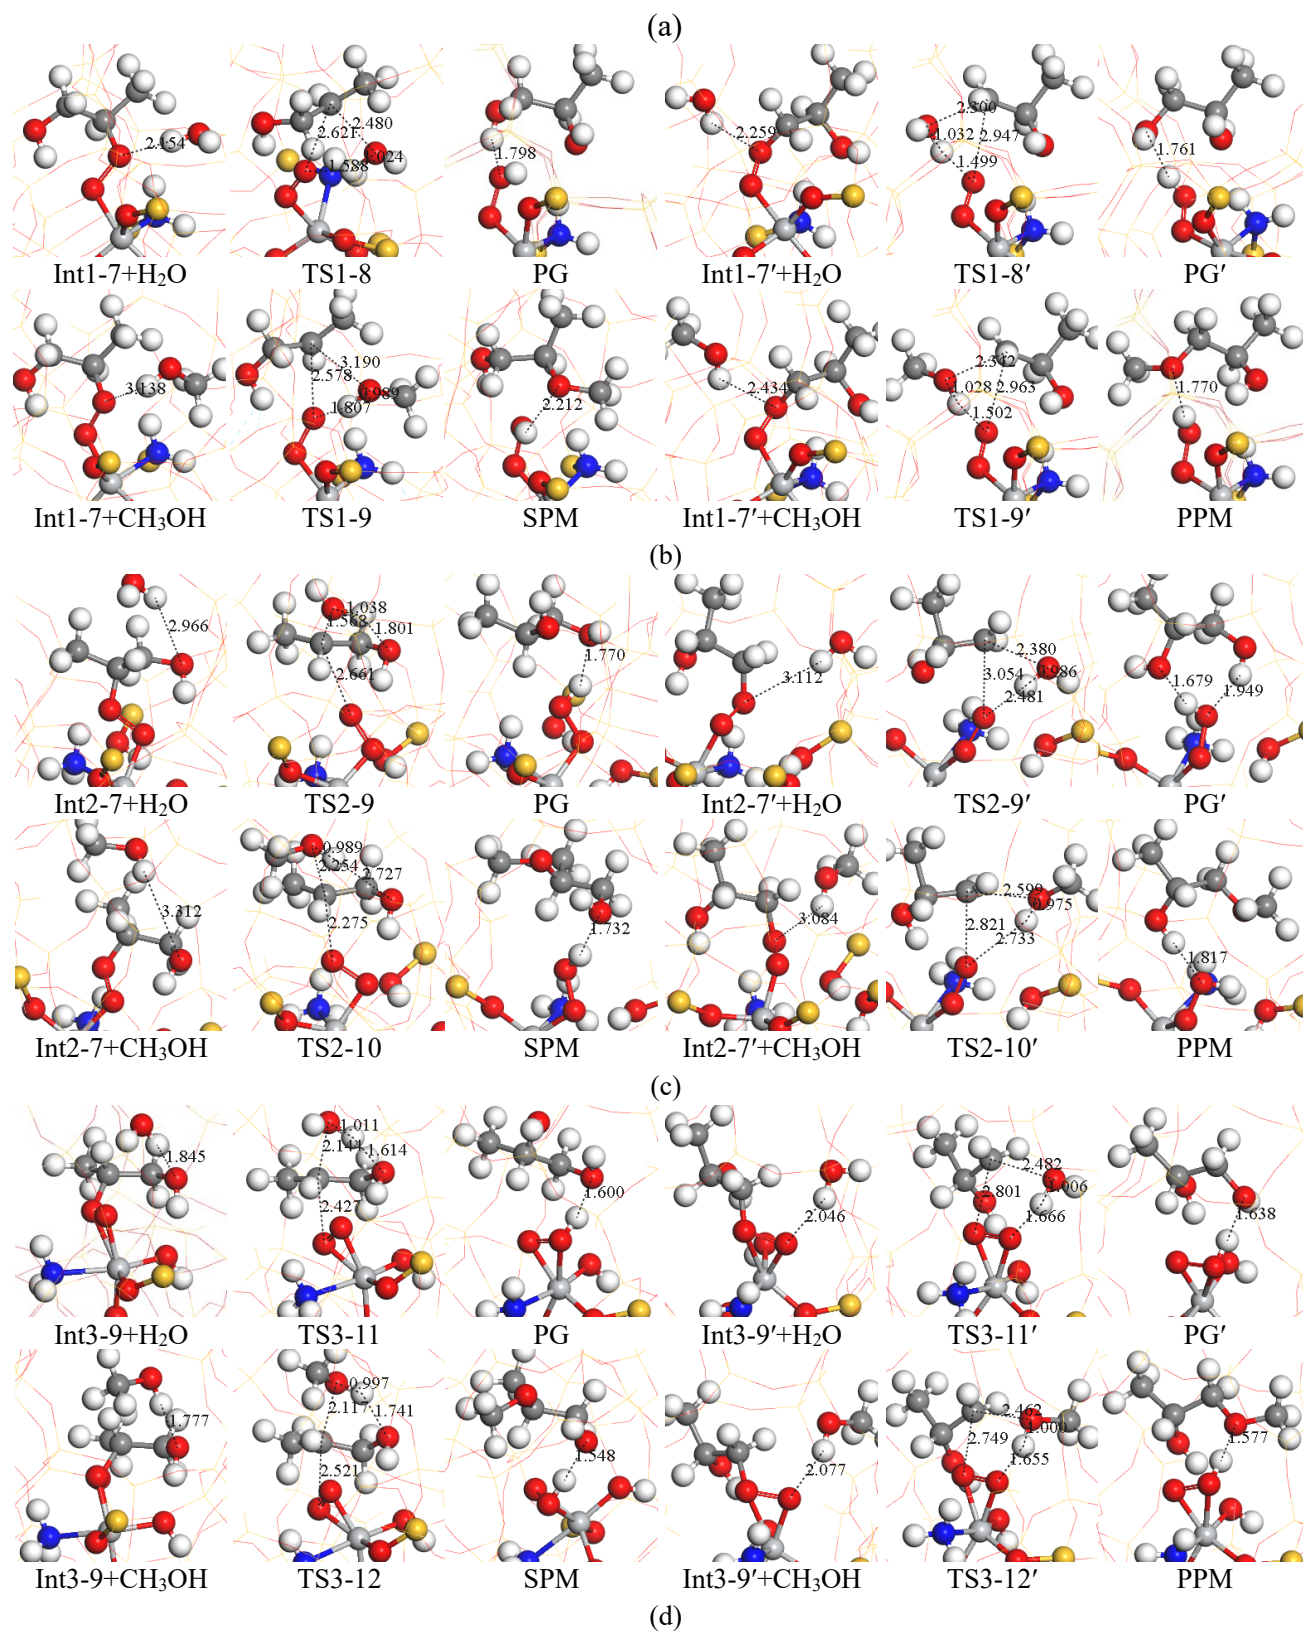

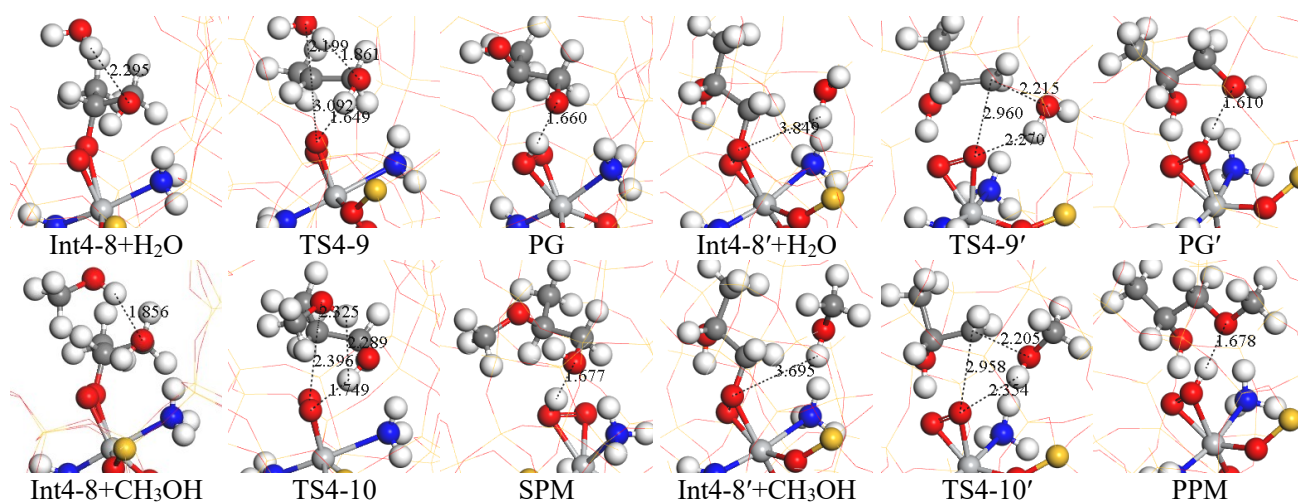

**Fig. S14** Structures of reactant, transition state and product for PG, SPM and PPM formation *via* “two-step” mechanism at the nitrated (a) tetrahedral Ti, (b) Ti/defect, (c) bipodal Ti and (d) double embedded bipodal Ti sites at 313 K; The bond length is in Å (N = blue, Ti = light grey, C = grey, O = red, Si = yellow and H = white).

The potential energy diagrams of the entire reaction path for the formation of PG, SPM and PPM through the “two-step” mechanism

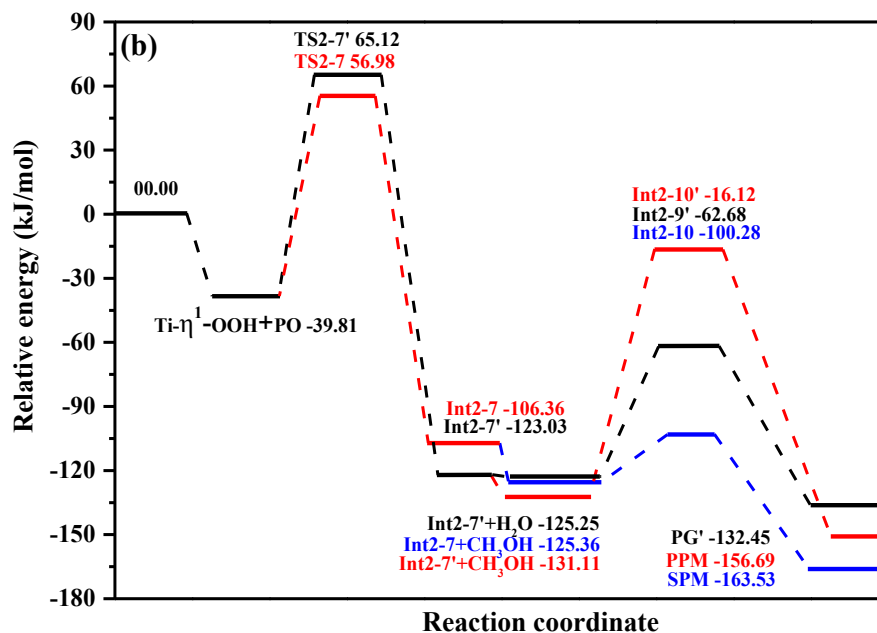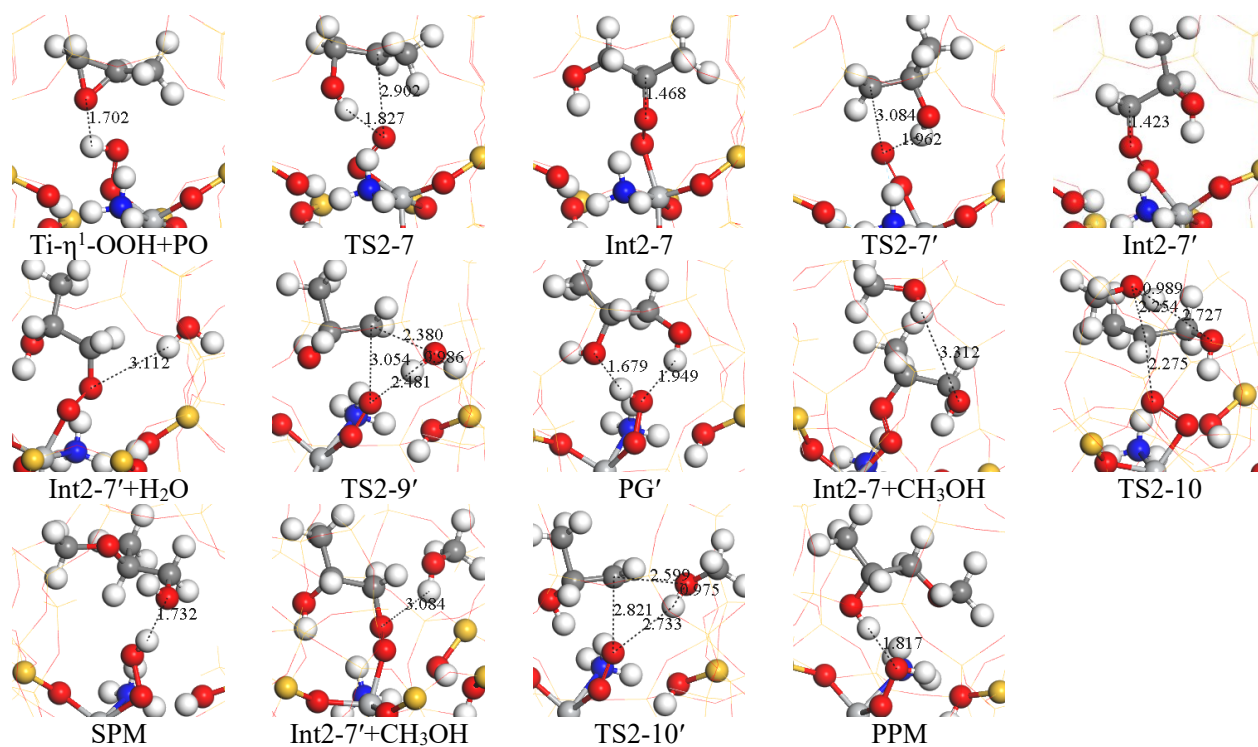

**Fig. S15** Relative energy profiles of optimal paths of PG, PPM and SPM formation *via* “two-step” mechanism at the nitrated Ti/defect site at 313 K; The bond length is in Å (N = blue, Ti = light grey, C = grey, O = red, Si = yellow and H = white).

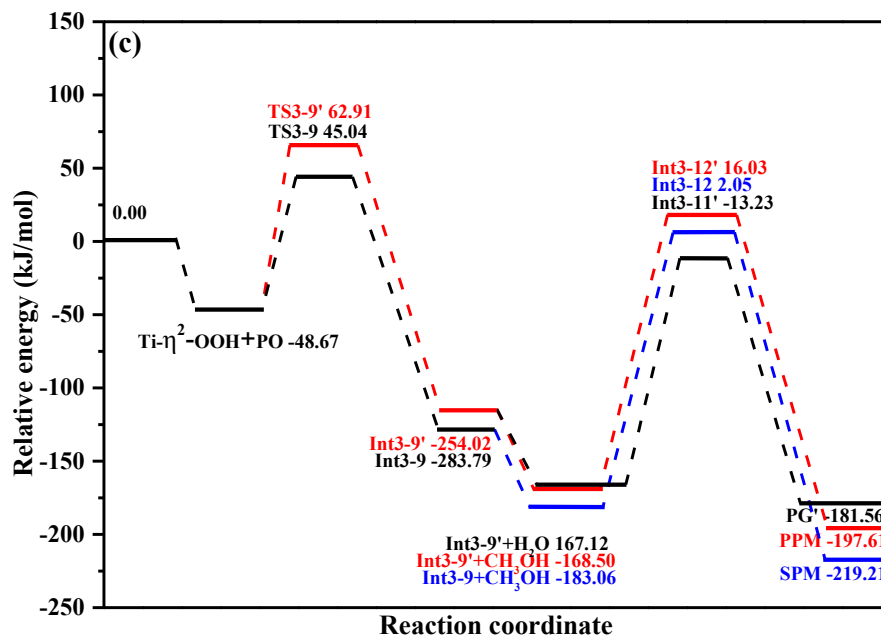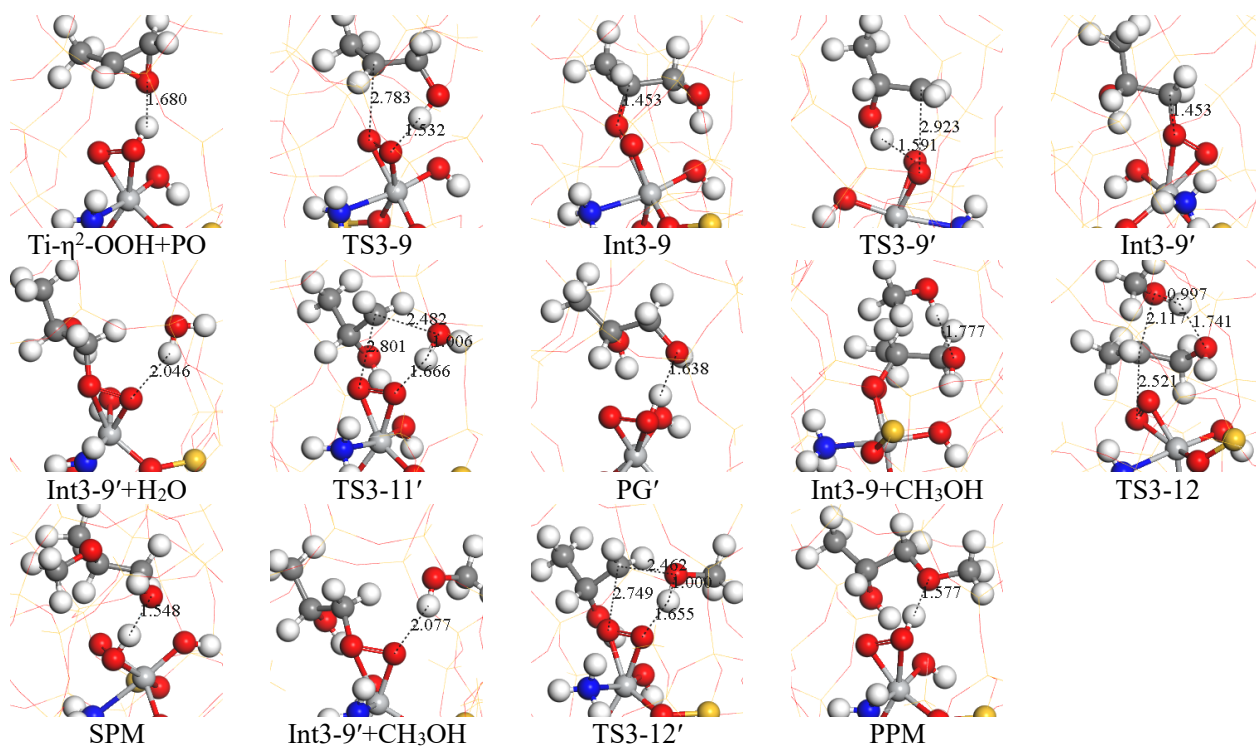

**Fig. S16** Relative energy profiles of optimal paths of PG, PPM and SPM formation *via* “two-step” mechanism at the nitrated bipodal Ti site at 313 K; The bond length is in Å (N = blue, Ti = light grey, C = grey, O = red, Si = yellow and H = white).

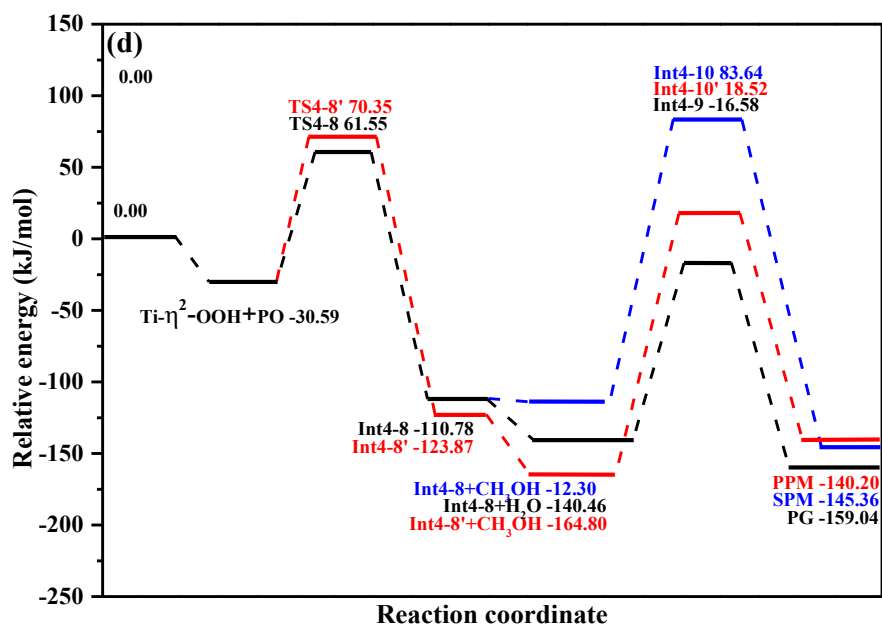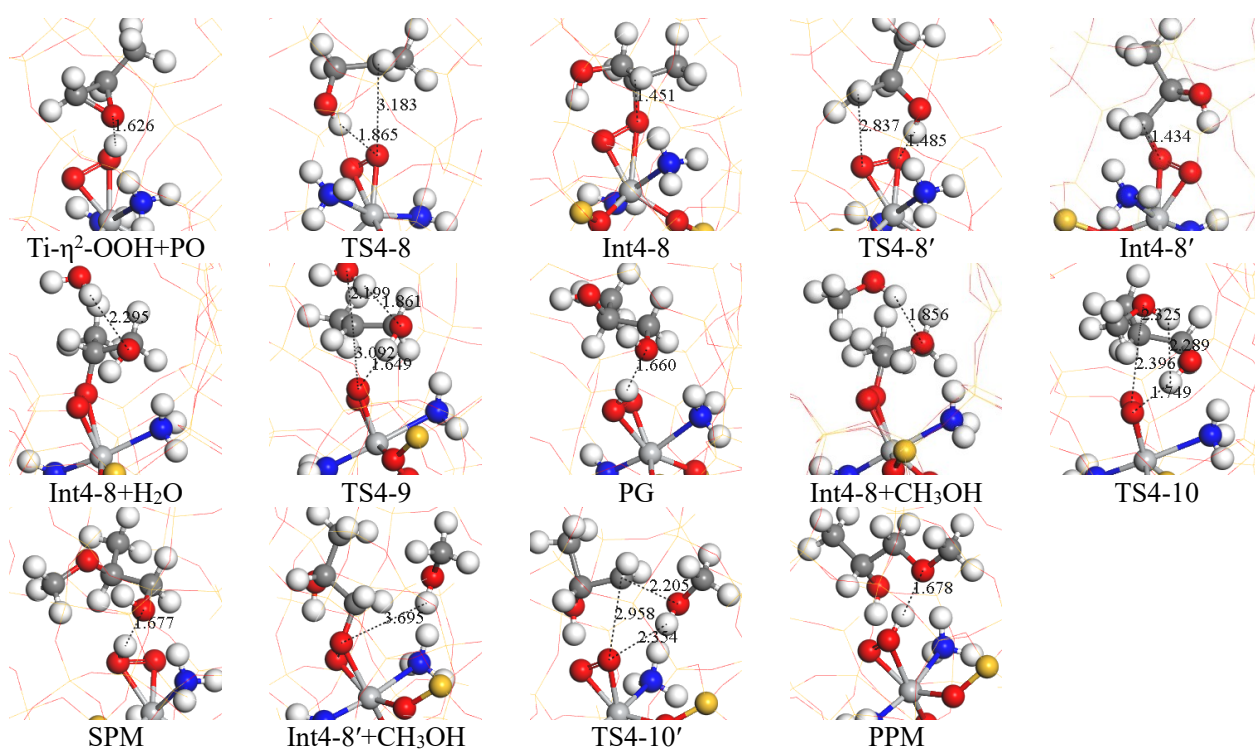

**Fig. S17** Relative energy profiles of optimal paths of PG, PPM and SPM formation *via* “two-step” mechanism at the nitrated double embedded bipodal Ti site at 313 K; The bond length is in Å (N = blue, Ti = light grey, C = grey, O = red, Si = yellow and H = white).

The potential energy diagrams of the entire reaction path for the formation of PG, SPM and PPM through the “one-step” mechanism

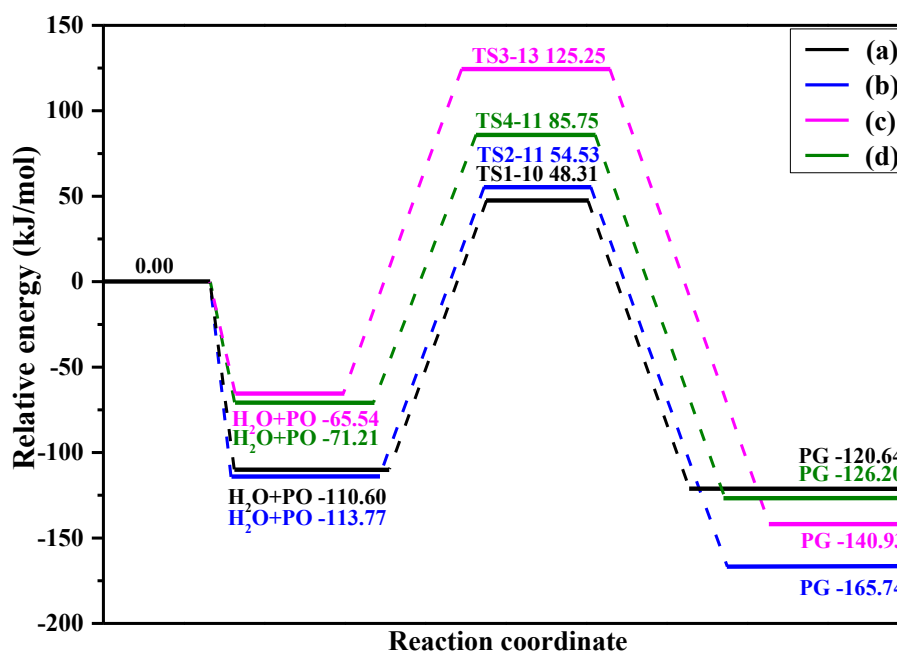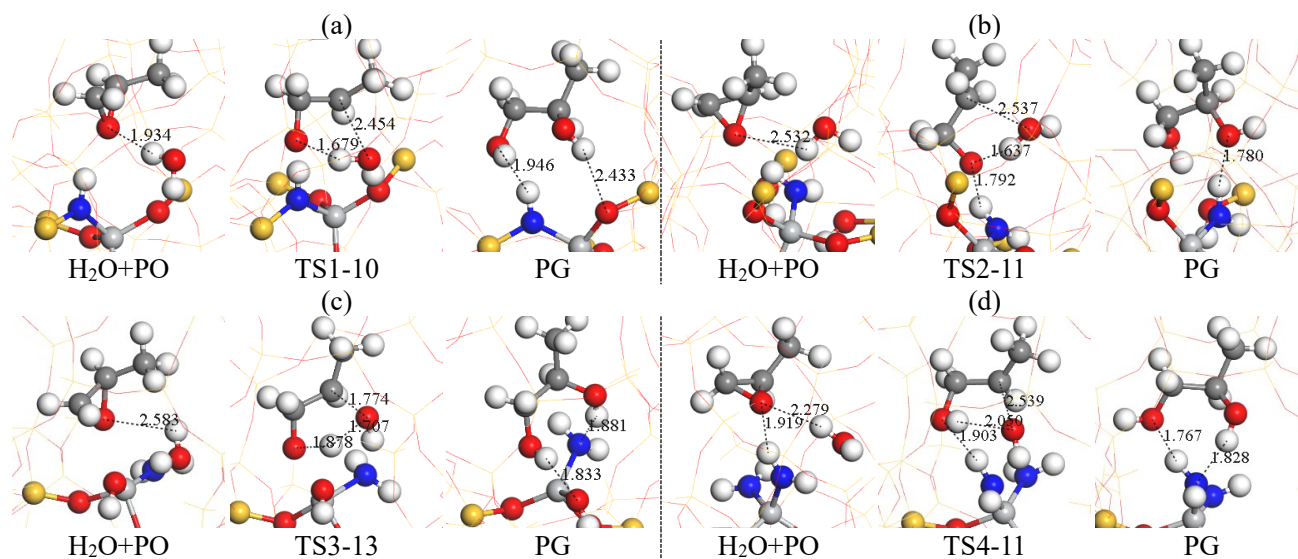

**Fig. S18** Potential energy profiles of PG formation via “one-step” reaction mechanism, together with the structures of reactant, transition state and product at the nitrated (a) tetrahedral Ti, (b) Ti/defect, (c) bipodal Ti and (d) double embedded bipodal Ti sites at 313 K; The bond length is in Å (N = blue, Ti = light grey, C = grey, O = red, Si = yellow and H = white).

Fig. S18 shows the potential energy diagrams of PG generated by “one-step” mechanism and the structures of the corresponding reactants, transition states and products. The obtained activation free energies are 158.91, 176.87, 168.30, 190.79 and 156.96 kJ/mol, respectively, and the corresponding reaction free energies are -10.04, -60.76, -51.97, -75.39 and -54.99 kJ/mol.

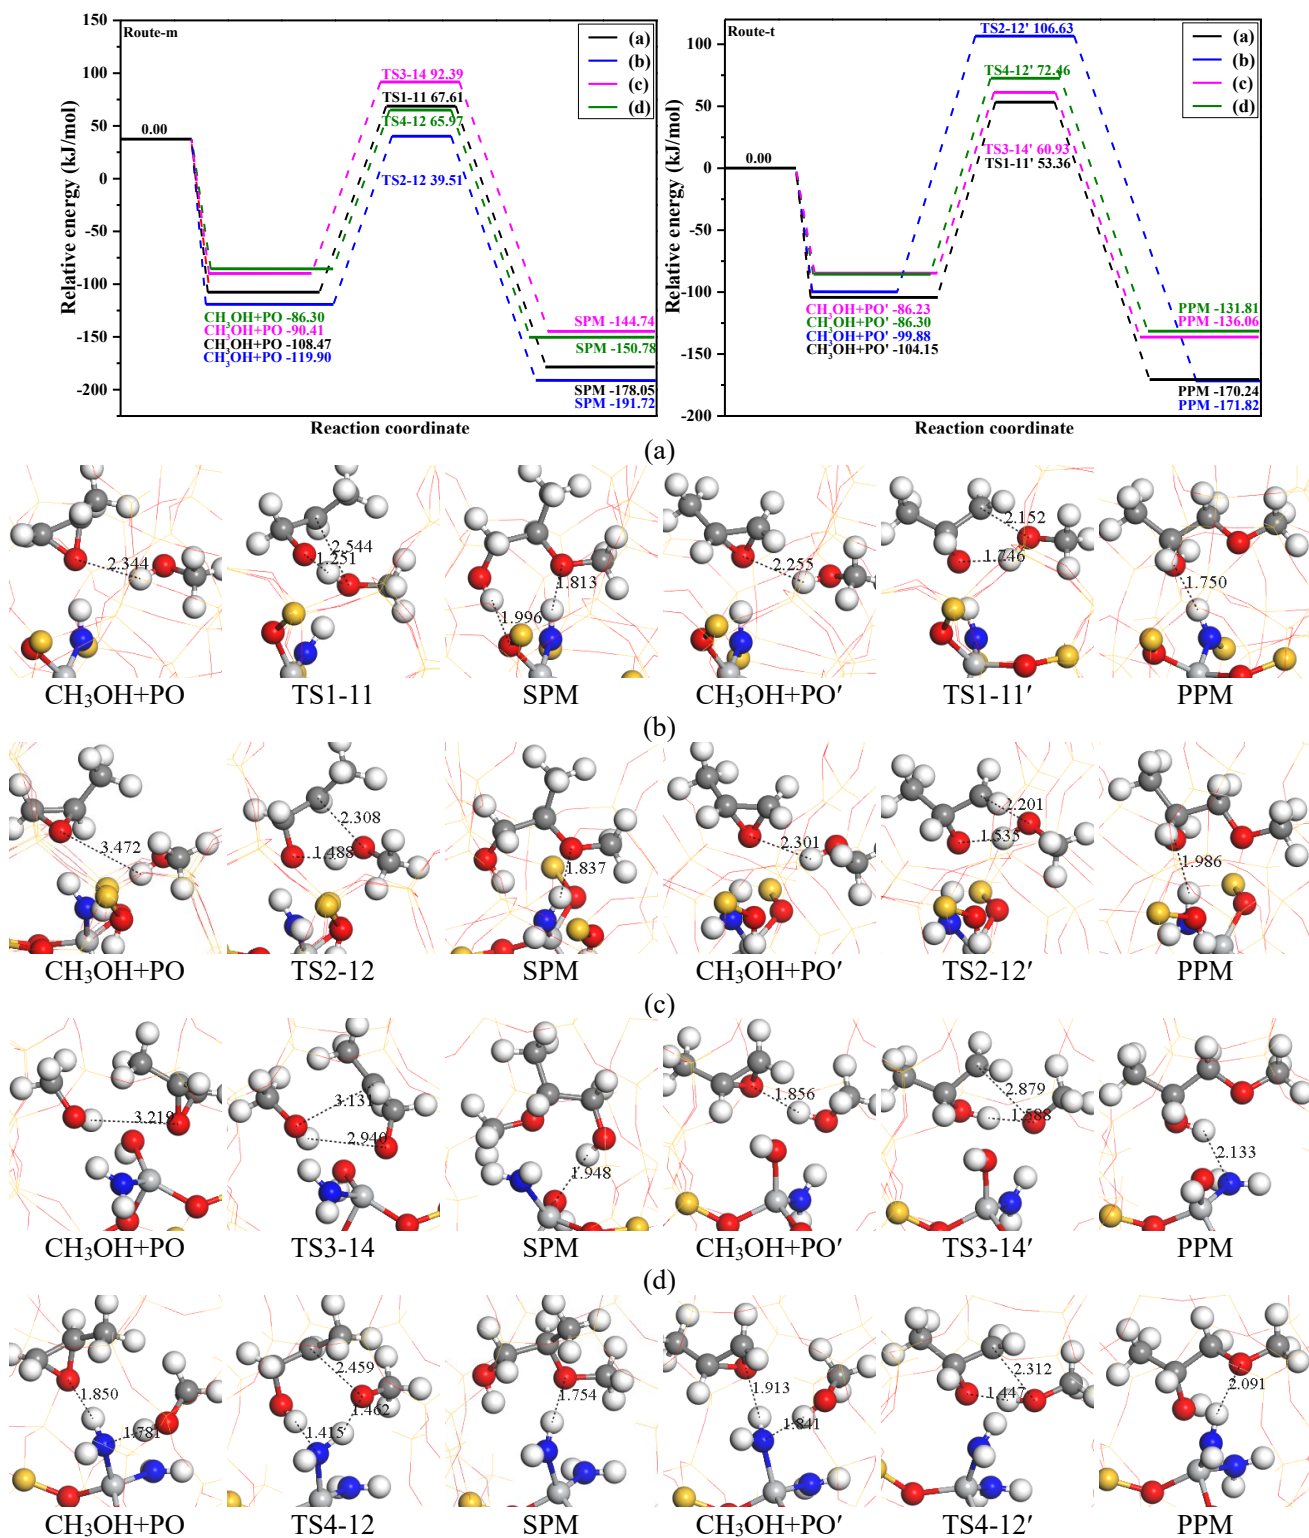

**Fig. S19** Potential energy profiles of SPM and PPM formations *via* "one-step" mechanism, together with the structures of reactant, transition state and product on nitrated (a) tetrahedral Ti, (b) Ti/defect, (c) bipodal Ti and (d) double embedded bipodal Ti sites at 313 K; The bond length is in Å (N = blue, Ti = light grey, C = grey, O = red, Si = yellow and H = white).

Fig. S19 show the potential energy diagrams of SPM and PPM generated by “one-step” mechanism and the structures of the corresponding reactants, transition states and products. The activation free energy barriers that need to be overcome to form SPM are 176.08, 205.85, 159.41, 182.8 and 152.27 kJ/mol, respectively, and the corresponding reaction free energies are -69.58, -56.14, -71.82, -54.33 and -64.48 kJ/mol. The activation free energy and reaction free energy obtained for PPM formation are 157.51, 187.57, 206.51, 147.16, 158.76 kJ/mol and -66.09, -48.12, -71.94, -49.83, -45.51 kJ/mol, respectively. Comparing the total activation free energy barriers of two reaction mechanisms to generate PG, SPM and PPM, it can be determined that except for the coexistence of “one-step” and “two-step” reaction mechanism for PG reaction at nitrated tetrahedral Ti site, the other active centers pass through “two-step” mechanism are more favorable.

## S8 Calculation of thermodynamic parameters and microkinetic analysis of propylene epoxidation

Adsorption free energy, activation free energy and reaction free energy were calculated using the following formulas:

$$G_{\text{ads}} = E_{(\text{adsorbate/catalyst})} - E_{(\text{catalyst})} - E_{(\text{adsorbate})} + \Delta G_{\text{ads}} \quad (1)$$

$$\Delta G_{\text{ads}} = G_{(\text{adsorbate/catalyst})} - G_{(\text{catalyst})} - G_{(\text{adsorbate})} \quad (2)$$

$$G_{\text{a}} = E_{\text{TS}} - E_{\text{R}} + \Delta G_{\text{a}} \quad (3)$$

$$\Delta G = E_{\text{P}} - E_{\text{R}} + \Delta G_{\text{H}} \quad (4)$$

$$\Delta G_{\text{a}} = G_{\text{TS}} - G_{\text{R}} \quad (5)$$

$$\Delta G_{\text{H}} = G_{\text{P}} - G_{\text{R}} \quad (6)$$

Where  $E_{(\text{adsorbate/catalyst})}$ ,  $E_{(\text{adsorbate})}$  and  $E_{(\text{catalyst})}$  are the total energy of the adsorbate-catalyst complex, catalyst, and adsorbate, respectively.  $E_{\text{R}}$ ,  $E_{\text{TS}}$  and  $E_{\text{P}}$  are the total energies of reactant, transition state and final state in an elementary reaction, respectively.  $G_{\text{R}}$ ,  $G_{\text{TS}}$  and  $G_{\text{P}}$  are the Gibbs free energy corrections of reactant, transition state and final state, respectively. Considering the contributions of thermal energy and entropy to the standard molar Gibbs free energy, the standard molar Gibbs free energy can be obtained using following formula.<sup>11-13</sup>

$$G = E_{\text{total}} + E_{\text{ZPE}} + U - TS + \gamma RT \quad (7)$$

$$E_{\text{ZPE}} = \sum_i \frac{h\nu_i}{2} \quad (8)$$

$$U_{\text{Vib}} = RT \sum_i \frac{h\nu_i/k_{\text{B}}T}{e^{h\nu_i/k_{\text{B}}T} - 1} \quad (9)$$

$$S = R \sum_{i=1}^n -\ln(1 - e^{-h\nu_i/k_{\text{B}}T}) + \frac{h\nu_i/k_{\text{B}}T}{e^{h\nu_i/k_{\text{B}}T} - 1} \quad (10)$$

Where  $E_{\text{total}}$  is the QM/MM total energy,  $R$  is the gas constant,  $\gamma = 0$  for adsorbed species and 1 for isolated molecules,  $k_{\text{B}}$  is the Boltzmann constant, and  $T$  is the reaction temperature (313~333 K);  $R$  is the gas constant, and  $\gamma$  is 0 for adsorbed species, and 1 for isolated molecule;  $k_{\text{B}}$  is the Boltzmann constant,  $T$  is the actual temperature. All the calculation results are summarized in Table S7-S10.

With respect of “one-step” mechanism for propylene epoxidation, the adsorptions of  $\text{H}_2\text{O}_2$ ,  $\text{CH}_3\text{OH}$ ,  $\text{C}_3\text{H}_6$  and  $\text{H}_2\text{O}$  are presumed to represent equilibrium, in which equilibrium coverage determined as function of reactant mole ratios, and assuming competitive Langmuir adsorption and excluding possible other adsorbed species, such as PO.

The coverages are calculated by the following formulas:

$$\theta_{\text{H}_2\text{O}_2} = \frac{K_{\text{H}_2\text{O}_2}[\text{H}_2\text{O}_2]}{1 + K_{\text{H}_2\text{O}_2}[\text{H}_2\text{O}_2] + K_{\text{C}_3\text{H}_6}[\text{C}_3\text{H}_6] + K_{\text{H}_2\text{O}}[\text{H}_2\text{O}] + K_{\text{CH}_3\text{OH}}[\text{CH}_3\text{OH}]} \quad (11)$$

$$\theta_{\text{C}_3\text{H}_6} = \frac{K_{\text{C}_3\text{H}_6}[\text{C}_3\text{H}_6]}{1 + K_{\text{H}_2\text{O}_2}[\text{H}_2\text{O}_2] + K_{\text{C}_3\text{H}_6}[\text{C}_3\text{H}_6] + K_{\text{H}_2\text{O}}[\text{H}_2\text{O}] + K_{\text{CH}_3\text{OH}}[\text{CH}_3\text{OH}]} \quad (12)$$

The equilibrium constants for  $\text{H}_2\text{O}_2$ ,  $\text{CH}_3\text{OH}$ ,  $\text{C}_3\text{H}_6$  and  $\text{H}_2\text{O}$  adsorption are estimated by the formula [14]:

$$K = \exp\left[-\frac{E_{\text{ads}} - T\Delta S}{k_{\text{B}}T}\right] \quad (13)$$

$E_{\text{ads}}$  are the adsorption free energies of  $\text{H}_2\text{O}_2$ ,  $\text{CH}_3\text{OH}$ ,  $\text{C}_3\text{H}_6$  and  $\text{H}_2\text{O}$ ,  $k_{\text{B}}$  is the Boltzmann constant,  $T$  is the reaction temperature (313 K) and  $\Delta S$  are the entropy changes of  $\text{H}_2\text{O}_2$ ,  $\text{CH}_3\text{OH}$ ,  $\text{C}_3\text{H}_6$  and  $\text{H}_2\text{O}$ , which are obtained from NIST Chemistry WebBook. The reaction rate constants ( $k$ ) can be obtained using harmonic transition state theory:<sup>14</sup>

$$k = \frac{k_{\text{B}}T}{h} \frac{q_{\text{TS}}}{q_{\text{R}}} \exp\left(-\frac{E_{\text{act}}}{k_{\text{B}}T}\right) \quad (14)$$

$$q = \frac{1}{\prod_{i=1}^{\text{Vibration}} \left[1 - \exp\left(-\frac{h\nu_i}{k_{\text{B}}T}\right)\right]} \quad (15)$$

Where  $k_{\text{B}}$  is the Boltzmann constant,  $T$  is the actual temperature (350 K), and  $E_{\text{act}}$  represents the zero-point-corrected activation free energy.

The reaction rate *via* “one-step” mechanism for PO formation is calculated by:

$$r_3 = k_3 \theta_{\text{H}_2\text{O}_2} \theta_{\text{C}_3\text{H}_6} \quad (16)$$

Under the experimental conditions, all reaction conditions at 313 K; the reactant mole ratios of  $[\text{H}_2\text{O}_2]$ ,  $[\text{CH}_3\text{OH}]$ ,  $[\text{H}_2\text{O}]$  in microkinetic analysis are 0.1, 0.5 and 0.4, correspondingly; the  $[\text{C}_3\text{H}_6]$  is 0.4 Mpa.<sup>15</sup>

For the “two-step” mechanism, we first considered  $\text{H}_2\text{O}_2$  adsorption and dissociation due to propylene epoxidation involves  $\text{Ti}-\eta^1\text{-OOH}$  or  $\text{Ti}-\eta^2\text{-OOH}$  intermediates. The reactions of  $\text{Ti}-\eta^1\text{-OOH}$  or  $\text{Ti}-\eta^2\text{-OOH}$  formation are supposed to be equilibrium. The step of produce PO is described by the forward rate. The site balance of intermediate species ( $\text{Ti}-\eta^1\text{-OOH}$  or  $\text{Ti}-\eta^2\text{-OOH}$ , intermediate of favorable paths is selected) included in the reaction mechanism can be written in terms of coverage ( $\theta_{\text{Ti-OOH}}$ ).

$$\theta_{\text{H}_2\text{O}_2} + \theta_{\text{Ti-OOH}} + \theta_{\text{H}_2\text{O}} + \theta_{\text{CH}_3\text{OH}} + \theta^* = 1 \quad (17)$$

The  $\theta^*$  is the coverage of vacancy. The coverage of  $\text{H}_2\text{O}_2$ ,  $\text{H}_2\text{O}$ ,  $\text{CH}_3\text{OH}$ , and  $\text{Ti-OOH}$  is calculated as follows:

$$\theta_{\text{H}_2\text{O}_2} = K_{\text{H}_2\text{O}_2}[\text{H}_2\text{O}_2]\theta^* \quad (18)$$

$$\theta_{\text{H}_2\text{O}} = K_{\text{H}_2\text{O}}[\text{H}_2\text{O}]\theta^* \quad (19)$$

$$\theta_{\text{CH}_3\text{OH}} = K_{\text{CH}_3\text{OH}}[\text{CH}_3\text{OH}]\theta^* \quad (20)$$

$$\theta_{\text{Ti-OOH}} = k_1\theta_{\text{H}_2\text{O}_2}\theta^* \quad (21)$$

By putting equations (18) (19) (20) and (21) into (17), we can calculate  $\theta^*$  and coverage of other species according to the equilibrium-state approximation presented as follows:

$$K_{\text{H}_2\text{O}_2}[\text{H}_2\text{O}_2]\theta^* + k_1\theta_{\text{H}_2\text{O}_2}\theta^*\theta^* + K_{\text{H}_2\text{O}}[\text{H}_2\text{O}]\theta^* + K_{\text{CH}_3\text{OH}}[\text{CH}_3\text{OH}]\theta^* + \theta^* = 1 \quad (22)$$

According to these equations, we can obtain the result of  $\theta_{\text{Ti-OOH}}$ . Therefore, the epoxidation reaction rate *via* “two-step” mechanism can be calculated by:

$$r_2 = k_2\theta_{\text{Ti-OOH}}[\text{C}_3\text{H}_6] \quad (23)$$

All equilibrium constants of  $\text{H}_2\text{O}_2$ ,  $\text{CH}_3\text{OH}$ ,  $\text{H}_2\text{O}$  and  $\text{C}_3\text{H}_6$  adsorption ( $K$ ) and the rate constants  $k$  ( $\text{s}^{-1}$ ) of  $\text{PL} \rightarrow \text{PO}$  *via* “one-step” and “two-step” mechanism used for calculation are summarized in Table S1.

**Table S4** The equilibrium constants of  $\text{H}_2\text{O}_2$ ,  $\text{CH}_3\text{OH}$ ,  $\text{H}_2\text{O}$  and  $\text{C}_3\text{H}_6$  adsorption ( $K$ ) and the rate constants  $k$  ( $\text{s}^{-1}$ ) of the related elementary reaction involved in  $\text{PL} \rightarrow \text{PO}$  at the nitrated (a) tetrahedral Ti, (b) Ti/defect, (c) bipodal Ti and (d) double embedded bipodal Ti sites ( $T=313$  K).

| $K/k$                      | (a)                   | (b)                   | (c)                   | (d)                |
|----------------------------|-----------------------|-----------------------|-----------------------|--------------------|
| $K_{\text{H}_2\text{O}_2}$ | $8.19 \times 10^7$    | $6.10 \times 10^9$    | $1.40 \times 10^{11}$ | $4.24 \times 10^8$ |
| $K_{\text{CH}_3\text{OH}}$ | $8.61 \times 10^{10}$ | $4.84 \times 10^8$    | $1.76 \times 10^8$    | $9.42 \times 10^9$ |
| $K_{\text{H}_2\text{O}}$   | $9.22 \times 10^8$    | $3.71 \times 10^9$    | $2.40 \times 10^7$    | $1.09 \times 10^6$ |
| $K_{\text{C}_3\text{H}_6}$ | $8.84 \times 10^8$    | $7.09 \times 10^7$    | $4.97 \times 10^7$    | $6.58 \times 10^8$ |
| $k_1$                      | $2.06 \times 10^{-1}$ | $6.94 \times 10^3$    | $5.58 \times 10^8$    | $7.87 \times 10^7$ |
| $k_2$                      | $9.49 \times 10^{-2}$ | $2.74 \times 10^5$    | $7.87 \times 10^2$    | $1.05 \times 10^1$ |
| $k_3$                      | $3.50 \times 10^{-2}$ | $2.46 \times 10^{-6}$ | $1.00 \times 10^0$    | $2.21 \times 10^0$ |

**Table S5** The equilibrium constants of H<sub>2</sub>O<sub>2</sub>, CH<sub>3</sub>OH, H<sub>2</sub>O and C<sub>3</sub>H<sub>6</sub> adsorption ( $K$ ) and the rate constants  $k$  (s<sup>-1</sup>) of the related elementary reaction involved in PL→PO at the (a) tetrahedral Ti, (b) Ti/defect and (c) bipodal Ti sites (T=313 K).

| $K/k$                      | (a)                   | (b)                   | (c)                   |
|----------------------------|-----------------------|-----------------------|-----------------------|
| $K_{\text{H}_2\text{O}_2}$ | $1.64 \times 10^6$    | $8.16 \times 10^9$    | $1.51 \times 10^{11}$ |
| $K_{\text{CH}_3\text{OH}}$ | $3.43 \times 10^8$    | $3.53 \times 10^{10}$ | $1.06 \times 10^{12}$ |
| $K_{\text{H}_2\text{O}}$   | $8.73 \times 10^5$    | $6.87 \times 10^9$    | $5.59 \times 10^8$    |
| $K_{\text{C}_3\text{H}_6}$ | $4.70 \times 10^7$    | $4.89 \times 10^6$    | $1.59 \times 10^{10}$ |
| $k_1$                      | $3.12 \times 10^{-8}$ | $1.69 \times 10^5$    | $6.67 \times 10^5$    |
| $k_2$                      | $6.13 \times 10^{-6}$ | $1.78 \times 10^{-1}$ | $4.60 \times 10^{10}$ |
| $k_3$                      | $2.71 \times 10^{-7}$ | $2.04 \times 10^{-5}$ | $1.33 \times 10^1$    |

**Table S6** The surface coverage of key intermediate species ( $\theta_{\text{Ti-OOH}}$ ) and the formation rate of PO ( $r$ , /s·site) involved in epoxidation reaction *via* “one-step” and “two-step” reaction mechanism at the (a) tetrahedral Ti, (b) Ti/defect and (c) bipodal Ti sites.

| Items                           | (a)                    | (b)                    | (c)                   |
|---------------------------------|------------------------|------------------------|-----------------------|
| “two-step” mechanism            |                        |                        |                       |
| $\theta_{\text{Ti-OOH}}$        | $3.40 \times 10^{-17}$ | $4.00 \times 10^{-2}$  | $3.39 \times 10^{-8}$ |
| $r_2$                           | $3.68 \times 10^{-23}$ | $2.85 \times 10^{-2}$  | $6.23 \times 10^3$    |
| “one-step” mechanism            |                        |                        |                       |
| $\theta_{\text{H}_2\text{O}_2}$ | $4.56 \times 10^{-4}$  | $3.84 \times 10^{-2}$  | $2.48 \times 10^{-2}$ |
| $\theta_{\text{C}_3\text{H}_6}$ | $5.22 \times 10^{-1}$  | $9.21 \times 10^{-4}$  | $1.04 \times 10^{-1}$ |
| $r_3$                           | $7.42 \times 10^{-12}$ | $7.22 \times 10^{-10}$ | $4.20 \times 10^{-3}$ |

**Table S7** The corresponding activation free energy ( $G_a$ , kJ/mol), reaction free energies ( $\Delta G$ , kJ/mol) and the only one imaginary frequency of transition state ( $\nu$ , cm<sup>-1</sup>) involved in the propylene epoxidation reaction at the nitrated (a) tetrahedral Ti, (b) Ti/defect, (c) bipodal Ti and (d) double embedded bipodal Ti sites, T=313 K and those in parenthesis at 0 K.

| Nitrated TS-1 modes | Transition states | $G_a$ , kJ/mol | $\Delta G$ , kJ/mol | $\nu$ , cm <sup>-1</sup> |
|---------------------|-------------------|----------------|---------------------|--------------------------|
| Tetrahedral Ti site | TS1-1             | 75.55(70.10)   | -1.55(-8.47)        | -183.70                  |
|                     | TS1-2             | 83.12(83.05)   | -179.37(-183.26)    | -212.92                  |
|                     | TS1-3             | 91.52(97.06)   | -187.03(-181.93)    | -486.34                  |
| Ti/defect site      | TS2-1             | 99.92(99.37)   | -99.64(-108.29)     | -253.75                  |
|                     | TS2-2             | 47.81(55.44)   | -227.49(-223.15)    | -385.62                  |
|                     | TS2-1'            | 44.83(35.80)   | -77.17(-86.36)      | -389.30                  |
|                     | TS2-2'            | 48.06(51.62)   | -228.99(-229.55)    | -406.97                  |
|                     | TS2-3             | 107.81(104.86) | -287.15(-313.80)    | -425.78                  |

|                                 |        |              |                  |         |
|---------------------------------|--------|--------------|------------------|---------|
| Bipodal Ti site                 | TS3-1  | 21.70(24.15) | -56.50(-55.83)   | -711.34 |
|                                 | TS3-2  | 58.46(47.69) | -195.37(-207.64) | -419.24 |
|                                 | TS3-1' | 23.84(23.18) | -67.24(-68.48)   | -742.49 |
|                                 | TS3-2' | 62.57(65.42) | -184.29(-192.15) | -516.07 |
|                                 | TS3-3  | 72.67(68.22) | -237.66(-248.08) | -526.86 |
| Double embedded bipodal Ti site | TS4-1  | 27.53(25.48) | -83.86(-85.12)   | -700.38 |
|                                 | TS4-2  | 68.68(66.44) | -190.05(-191.86) | -320.23 |
|                                 | TS4-3  | 71.57(68.09) | -239.33(-246.59) | -442.10 |

**Table S8** The corresponding activation free energy ( $G_a$ , kJ/mol), reaction free energies ( $\Delta G$ , kJ/mol) and the only one imaginary frequency of transition state ( $\nu$ ,  $\text{cm}^{-1}$ ) involved in the dissociation of  $\text{H}_2\text{O}$  at the nitrated tetrahedral Ti, Ti/defect, bipodal Ti and double embedded bipodal Ti sites,  $T=313$  K and those in parenthesis at 0 K.

| Nitrated TS-1 modes             | Transition states | $G_a$ , kJ/mol | $\Delta G$ , kJ/mol | $\nu$ , $\text{cm}^{-1}$ |
|---------------------------------|-------------------|----------------|---------------------|--------------------------|
| Tetrahedral Ti site             | TS1-4             | 88.90(77.39)   | 48.09(37.34)        | -1091.35                 |
| Ti/defect site                  | TS2-4             | 52.89(48.14)   | -95.75(-105.06)     | -336.30                  |
| Bipodal Ti site                 | TS3-4             | 37.73(34.14)   | -58.64(-61.08)      | -838.35                  |
| Double embedded bipodal Ti site | TS4-4             | 43.67(37.00)   | -68.87(-73.93)      | -1015.35                 |

**Table S9** The corresponding activation free energy ( $G_a$ , kJ/mol), reaction free energies ( $\Delta G$ , kJ/mol) and the only one imaginary frequency of transition state ( $\nu$ ,  $\text{cm}^{-1}$ ) involved in the ring-opening of PO with Ti-OH, Ti- $\eta^1$ -OOH and Ti- $\eta^2$ -OOH nucleophiles at the nitrated (a) tetrahedral Ti, (b) Ti/defect, (c) bipodal Ti and (d) double embedded bipodal Ti sites,  $T=313$  K and those in parenthesis at 0 K.

| Nitrated TS-1 modes | Transition states | $G_a$ , kJ/mol | $\Delta G$ , kJ/mol | $\nu$ , $\text{cm}^{-1}$ |
|---------------------|-------------------|----------------|---------------------|--------------------------|
| Tetrahedral Ti site | TS1-5             | 266.29(252.77) | -8.95(-23.83)       | -647.04                  |
|                     | TS1-5'            | 206.22(197.23) | -40.79(-54.72)      | -568.29                  |
|                     | TS1-6             | 175.15(164.31) | -23.74(-33.61)      | -491.23                  |
|                     | TS1-6'            | 228.33(215.70) | -67.11(-80.47)      | -632.65                  |
|                     | TS1-7             | 153.07(139.02) | -63.36(-74.32)      | -647.91                  |
|                     | TS1-7'            | 135.23(128.79) | -65.20(-75.46)      | -591.15                  |
|                     | TS1s              | 185.39(185.96) | -11.53(-19.00)      | -725.86                  |
|                     | TS1s'             | 213.76(208.08) | -44.13(-52.58)      | -552.57                  |
| Ti/defect site      | TS2-5             | 179.06(174.64) | -69.29(-77.63)      | -592.21                  |
|                     | TS2-5'            | 200.20(193.50) | -85.03(-90.99)      | -616.89                  |
|                     | TS2-6             | 143.35(142.84) | -65.96(-69.60)      | -518.43                  |
|                     | TS2-6'            | 174.37(172.28) | -78.99(-87.02)      | -585.88                  |
|                     | TS2-7             | 96.79(93.75)   | -66.55(-72.88)      | -244.24                  |

|                                    |        |                |                  |         |
|------------------------------------|--------|----------------|------------------|---------|
| Bipodal Ti site                    | TS2-7' | 104.93(108.70) | -83.22(-90.81)   | -315.15 |
|                                    | TS2-8  | 98.91(93.68)   | -69.27(-76.65)   | -319.63 |
|                                    | TS2-8' | 120.38(118.88) | -86.97(-92.59)   | -362.74 |
|                                    | TS2s   | 233.75(233.52) | -38.27(-51.04)   | -571.61 |
|                                    | TS2s'  | 204.76(199.48) | -51.36(-63.90)   | -522.42 |
|                                    | TS3-5  | 157.07(172.01) | -50.79(-51.04)   | -524.28 |
|                                    | TS3-5' | 177.82(188.66) | -67.63(-69.05)   | -592.63 |
|                                    | TS3-6  | 128.84(142.47) | -44.17(-49.27)   | -454.99 |
|                                    | TS3-6' | 174.31(179.32) | -72.69(-68.11)   | -553.11 |
|                                    | TS3-7  | 154.70(160.52) | -75.30(-70.13)   | -421.99 |
|                                    | TS3-7' | 104.42(110.44) | -70.55(-67.55)   | -347.93 |
|                                    | TS3-8  | 116.15(118.18) | -105.87(-108.31) | -365.53 |
|                                    | TS3-8' | 111.60(99.90)  | -69.64(-70.74)   | -375.48 |
|                                    | TS3-9  | 93.71(96.24)   | -67.09(-65.62)   | -303.48 |
|                                    | TS3-9' | 111.58(117.85) | -82.32(-82.44)   | -382.15 |
| Double embedded<br>bipodal Ti site | TS4-5  | 133.18(135.59) | -96.36(-100.42)  | -362.05 |
|                                    | TS4-5' | 166.13(169.76) | -95.25(-96.86)   | -433.83 |
|                                    | TS4-6  | 132.24(133.28) | -73.70(-72.74)   | -346.76 |
|                                    | TS4-6' | 161.29(156.15) | -105.33(-110.28) | -436.76 |
|                                    | TS4-7  | 136.81(140.18) | -89.47(-86.85)   | -405.20 |
|                                    | TS4-7' | 115.42(116.21) | -99.37(-104.24)  | -333.04 |
|                                    | TS4-8  | 92.14(91.64)   | -80.19(-76.83)   | -313.52 |
|                                    | TS4-8' | 100.94(103.40) | -93.28(-94.88)   | -312.14 |

**Table S10** The adsorption free energy of H<sub>2</sub>O or CH<sub>3</sub>OH ( $G_{\text{ads}}$ , kJ/mol), the activation free energy ( $G_{\text{a}}$ , kJ/mol), reaction free energy ( $\Delta G$ , kJ/mol) and the only one imaginary frequency of transition state ( $\nu$ , cm<sup>-1</sup>) involved in PG, SPM and PPM formation *via* “two-step” reaction mechanism at the nitrated tetrahedral Ti, Ti/defect, bipodal Ti and double embedded bipodal Ti sites at 313 K.

| Nitrated TS-1 modes | Transition states | $G_{\text{ads}}$ (kJ/mol) | $G_{\text{a}}$ (kJ/mol) | $\Delta G$ (kJ/mol) | $\nu$ (cm <sup>-1</sup> ) |
|---------------------|-------------------|---------------------------|-------------------------|---------------------|---------------------------|
| Tetrahedral Ti site | TS1-8             | -40.93(-29.70)            | 198.34(188.81)          | 33.72(30.38)        | -367.19                   |
|                     | TS1-8'            | -34.11(-25.03)            | 235.35(233.84)          | 29.10(30.43)        | -400.77                   |
|                     | TS1-9             | -35.12(-21.12)            | 196.98(204.52)          | 38.09(33.72)        | -419.45                   |
|                     | TS1-9'            | -29.32(-13.35)            | 174.12(172.84)          | 5.88(1.88)          | -323.24                   |
| Ti/defect site      | TS2-9             | -18.89(-7.01)             | 62.37(51.77)            | -7.20(-12.11)       | -236.08                   |
|                     | TS2-9'            | -8.73(7.58)               | 195.44(180.99)          | -14.66(-26.25)      | -365.96                   |
|                     | TS2-10            | -19.00(-1.49)             | 25.08(26.06)            | -38.17(-37.58)      | -249.14                   |
|                     | TS2-10'           | -8.08(9.74)               | 114.99(119.43)          | -25.58(-26.67)      | -318.24                   |
| Bipodal Ti site     | TS3-11            | -65.56(-59.52)            | 80.24(85.14)            | -64.02(-62.65)      | -296.27                   |
|                     | TS3-11'           | -28.46(-13.87)            | 141.96(138.95)          | -4.19(-11.18)       | -356.34                   |
|                     | TS3-12            | -20.62(-5.29)             | 75.68(64.82)            | -15.71(-23.69)      | -340.92                   |

|                 |         |                 |                |                |         |
|-----------------|---------|-----------------|----------------|----------------|---------|
|                 | TS3-12' | -9.86(-2.14)    | 180.99(182.42) | -56.70(-48.76) | -371.20 |
| Double embedded | TS4-9   | -29.68((-23.51) | 123.88(130.80) | -18.58(-20.96) | -310.08 |
| bipodal Ti site | TS4-9'  | -46.50(-40.28)  | 233.10(229.19) | 42.31(38.27)   | -398.46 |
|                 | TS4-10  | -1.52(5.21)     | 195.94(209.89) | -33.06(-34.11) | -403.01 |
|                 | TS4-10' | -40.93(-26.92)  | 183.32(178.83) | 24.60(14.71)   | -382.86 |

## S9 Definitions of desorption barrier and PO selectivity

Once the target product is formed at the catalytically active Ti site, there will be two paths: (1) desorption from the active site *via* overcome one desorption energy barrier; (2) ring-opening and conversion into by-products at the active site through an activation energy barrier. Previous studies have shown that the desorption barrier is approximately equal to the absolute value of adsorption energy,<sup>16</sup> therefore, the adsorption energy of PO is used as its' desorption barrier. Therefore, the selectivity of propylene epoxidation to PO is evaluated by the difference between the overall barrier of side reaction and its desorption barrier, which is denoted according to the formula:  $\Delta G_a = G_a - |G_{ads}|$ , where  $G_a$  is the overall energy barrier of PO conversion into by-products, and  $G_{ads}$  is the corresponding adsorption free energy of PO.<sup>17</sup> With above definition, the higher value of  $\Delta G_a$ , the better selectivity of PO.

## S10 Comparison of Brønsted/Lewis acidity

The Ti in active site is considered the Lewis acid because it can accept electrons, therefore, the strengths of Lewis acid can be investigated through exploring the geometry parameters, Mulliken charge, vibrational frequency and adsorption energy of the probe CO molecule adsorbed on Ti active sites.<sup>18</sup> The CO molecule bears a positive charge when it is adsorbed on active sites, simultaneously the charge on Ti is became smaller with the formation of the adsorbed complex, electrons transfer from the CO molecule to the Ti when CO adsorbed on active sites.

The strength of Brønsted acidic protons in nucleophile can be investigated through using trimethylphosphine oxide (TMPO) as the probe molecule.<sup>19</sup> The most obvious change after the adsorption of TMPO on different Brønsted protons of nucleophiles are the formation of hydrogen bond between TMPO and Brønsted acidic protons, and the notable increase of P-O bond length in TMPO compared to that of the bare TMPO. These are indicated that the occurrence of proton transfer from the host (Brønsted acid site) to the guest (TMPO), forming  $\text{TMPOH}^+$  cationic complex as consequence. The greater the change, the easier the proton transfer to TMPO, the stronger the Brønsted acidity. In addition, TMPO is adsorbed on the acid site, and the acid strength can also be determined by investigating the change of the stretching vibration frequency of O-H on the acid site. The hydrogen bond between TMPO and the H of the acid site will naturally weaken the chemical bond of O-H and shift the stretching vibration

frequency of O-H to the lower frequency. The larger the shift, the stronger the weakening of the O-H bond, the stronger the hydrogen bond formation here, indicating that the acidity is stronger.

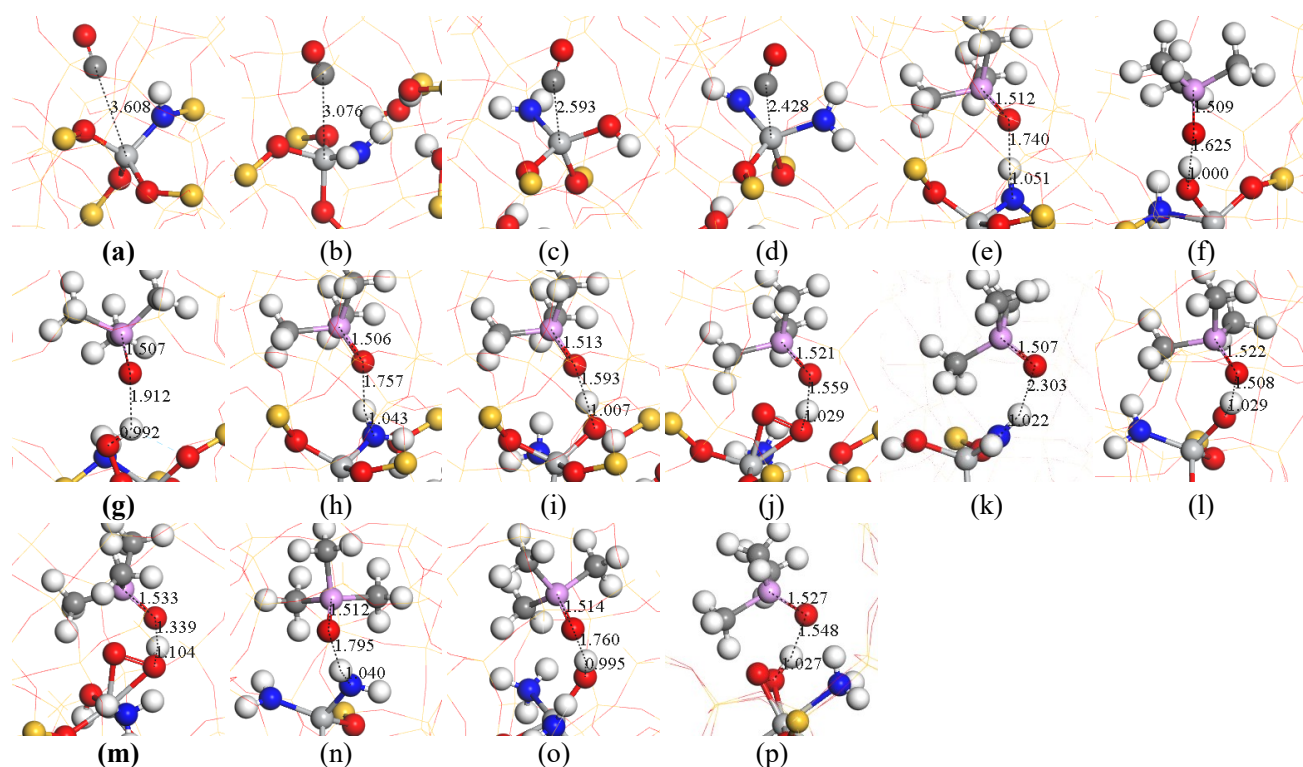

**Fig. S20** The Optimized geometries of CO molecule adsorbed on nitrated (a) tetrahedral Ti, (b) Ti/defect, (c) bipodal Ti and (d) double embedded bipodal Ti sites; the optimized geometries of the TMPO molecule adsorbed on different Brønsted protons of nucleophiles (e) Ti-O(H)-Si (nitrated tetrahedral Ti site), (f) Ti-OH (nitrated tetrahedral Ti site), (g) Ti- $\eta^1$ -OOH (nitrated tetrahedral Ti site), (h) Ti-NH<sub>2</sub> (nitrated Ti/defect site) (i) Ti-OH (nitrated Ti/defect site), (j) Ti- $\eta^2$ -OOH (Ti/defect site), (k) Ti-NH<sub>2</sub> (bipodal Ti site), (l) Ti-OH (bipodal Ti site), (m) Ti- $\eta^2$ -OOH (bipodal Ti site), (n) Ti-NH<sub>2</sub> (double embedded bipodal Ti site), (o) Ti-OH (double embedded bipodal Ti site) and (p) Ti- $\eta^2$ -OOH (double embedded bipodal Ti site). The bond length is in Å (Ti = light grey, C = grey, O = red, Si = yellow, H = white).

**Table S11** Mulliken charges ( $|e|$ ) of  $C_{CO}$ ,  $O_{CO}$  and Ti atoms, adsorption energy ( $E_{ad}$ , kJ/mol) and vibrational frequency ( $\nu$ ,  $cm^{-1}$ ) for CO adsorbed on nitrated tetrahedral Ti, Ti/defect and bipodal Ti sites.

| Parameters                        | Mulliken charges ( $ e $ ) |          |       | Adsorption energy<br>(CO, kJ/mol) | Vibrational frequency<br>(CO, $cm^{-1}$ ) |
|-----------------------------------|----------------------------|----------|-------|-----------------------------------|-------------------------------------------|
|                                   | $C_{CO}$                   | $O_{CO}$ | Ti    |                                   |                                           |
| CO molecule                       | 0.096                      | -0.096   | --    | --                                | 2114.57                                   |
| Nitrated tetrahedral Ti site      | --                         | --       | 1.011 | --                                | --                                        |
| CO...Nitrated tetrahedral Ti site | 0.122                      | -0.115   | 1.007 | -10.13                            | 2114.23                                   |
| Nitrated Ti/defect site           | --                         | --       | 0.982 | --                                | --                                        |
| CO...Nitrated Ti/defect site      | 0.138                      | -0.112   | 0.946 | -13.97                            | 2113.97                                   |
| Nitrated bipodal Ti site          | --                         | --       | 1.052 | --                                | --                                        |
| CO...Nitrated bipodal Ti site     | 0.201                      | -0.093   | 0.915 | -15.05                            | 2125.90                                   |
| Double embedded bipodal Ti site   | --                         | --       | 0.928 | --                                | --                                        |
| CO...Bipodal Ti site              | 0.203                      | -0.106   | 0.787 | -2.29                             | 2089.93                                   |

**Table S12** The vibrational frequency of hydroxyl ( $\nu_{OH}$ ,  $cm^{-1}$ ) on different Brønsted protons of nucleophile; the different of vibrational frequency of hydroxyl before and after TMPO adsorption on different Brønsted protons ( $\Delta\nu_{OH}$ ,  $cm^{-1}$ ) of nitrated TS-1 catalyst.

| Brønsted protons                                     | $\nu_{OH}$ | $\Delta\nu_{OH}$ |
|------------------------------------------------------|------------|------------------|
| Ti-N(H)-Si (nitrated tetrahedral Ti site)            | 3505.01    | 506.32           |
| Ti-OH (nitrated tetrahedral Ti site)                 | 3776.97    | 671.69           |
| Ti- $\eta^1$ -OOH (nitrated tetrahedral Ti site)     | 3493.87    | 71.83            |
| Ti-NH <sub>2</sub> (nitrated Ti/defect site)         | 3461.44    | 324.81           |
| Ti-OH (nitrated Ti/defect Ti site)                   | 3591.63    | 534.94           |
| Ti- $\eta^2$ -OOH (nitrated Ti/defect Ti site)       | 3320.29    | 565.68           |
| Ti-NH <sub>2</sub> (nitrated bipodal Ti site)        | 3758.33    | 440.18           |
| Ti-OH (nitrated bipodal Ti site)                     | 3723.74    | 495.57           |
| Ti- $\eta^2$ -OOH (nitrated bipodal Ti site)         | 3578.00    | 765.62           |
| Ti-NH <sub>2</sub> (double embedded bipodal Ti site) | 3531.43    | 408.92           |
| Ti-OH (double embedded bipodal Ti site)              | 3754.57    | 508.58           |
| Ti- $\eta^2$ -OOH (double embedded bipodal Ti site)  | 3440.95    | 706.53           |

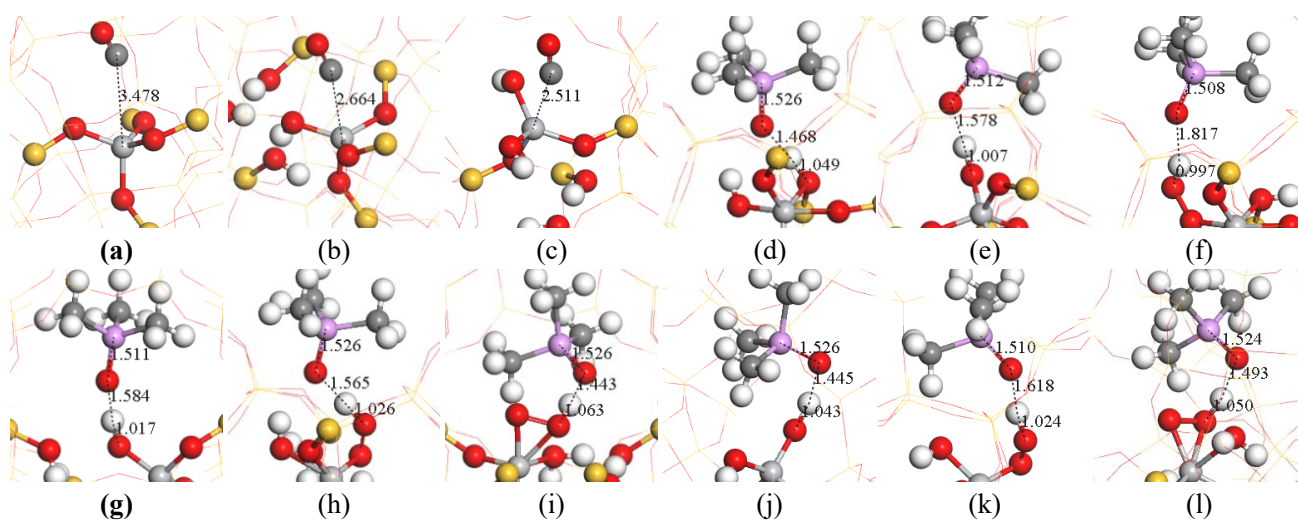

**Fig. S21** The Optimized geometries of CO molecule adsorbed on (a) tetrahedral Ti site, (b) Ti/defect and (c) bipodal Ti site; the optimized geometries of the TMPO molecule adsorbed on different Brønsted protons of nucleophiles (d) Ti-O(H)-Si (tetrahedral Ti site), (e) Ti-OH (tetrahedral Ti site), (f) Ti- $\eta^1$ -OOH (tetrahedral Ti site), (g) Ti-OH (Ti/defect site), (h) Ti- $\eta^1$ -OOH (Ti/defect site), (i) Ti- $\eta^2$ -OOH (Ti/defect site), (j) Ti-OH (bipodal Ti site), (k) Ti- $\eta^1$ -OOH (bipodal Ti site), (l) Ti- $\eta^2$ -OOH (bipodal Ti site). The bond length is in Å (Ti = light grey, C = grey, O = red, Si = yellow, H = white).

**Table S13** Mulliken charges ( $|e|$ ) of  $C_{CO}$ ,  $O_{CO}$  and Ti atoms, adsorption energy ( $E_{ad}$ , kJ/mol) and vibrational frequency ( $\nu$ ,  $cm^{-1}$ ) for CO adsorbed at the tetrahedral Ti, Ti/defect and bipodal Ti sites.

| Parameters               | Mulliken charges ( $ e $ ) |          |       | Adsorption energy<br>(CO, kJ/mol) | Vibrational frequency<br>(CO, $cm^{-1}$ ) |
|--------------------------|----------------------------|----------|-------|-----------------------------------|-------------------------------------------|
|                          | $C_{CO}$                   | $O_{CO}$ | Ti    |                                   |                                           |
| CO molecule              | 0.096                      | -0.096   | --    | --                                | 2114.57                                   |
| Tetrahedral Ti site      | --                         | --       | 1.152 | --                                | --                                        |
| CO...Tetrahedral Ti site | 0.132                      | -0.113   | 1.143 | -33.19                            | 2107.38                                   |
| Ti/defect site           | --                         | --       | 1.146 | --                                | --                                        |
| CO...Ti/defect site      | 0.207                      | -0.096   | 1.053 | -23.19                            | 2164.77                                   |
| Bipodal Ti site          | --                         | --       | 1.193 | --                                | --                                        |
| CO...Bipodal Ti site     | 0.237                      | -0.079   | 1.020 | -26.06                            | 2156.44                                   |

**Table S14** The vibrational frequency of hydroxyl ( $\nu_{OH}$ ,  $cm^{-1}$ ) on different Brønsted protons of nucleophile; the different of vibrational frequency of hydroxyl before and after TMPO adsorption on different Brønsted protons ( $\Delta\nu_{OH}$ ,  $cm^{-1}$ ).

| Brønsted protons                        | $\nu_{OH}$ | $\Delta\nu_{OH}$ |
|-----------------------------------------|------------|------------------|
| Ti-O(H)-Si (tetrahedral Ti site)        | 3123.08    | 736.77           |
| Ti-OH (tetrahedral Ti site)             | 3754.48    | 757.69           |
| Ti- $\eta^1$ -OOH (tetrahedral Ti site) | 3544.63    | 238.61           |
| Ti-OH (Ti/defect site)                  | 2892.22    | --               |
| Ti- $\eta^1$ -OOH (Ti/defect Ti site)   | 3624.64    | 841.71           |
| Ti- $\eta^2$ -OOH (Ti/defect Ti site)   | 3322.55    | 1100.12          |
| Ti-OH (bipodal Ti site)                 | 3750.09    | 1356.80          |
| Ti- $\eta^1$ -OOH (bipodal Ti site)     | 3354.78    | 518.79           |
| Ti- $\eta^2$ -OOH (bipodal Ti site)     | 3434.03    | 616.07           |

## Reference

- [1] H. Munakata, Y. Oumi, A. Miyamoto, *J. Phys. Chem. B*, 2001, **105**, 3493-3501.
- [2] C. A. Hajar, R. M. Jacubinas, J. Eckert, N. J. Henson, P. J. Hay, K. C. Ott, *J. Phys. Chem. B*, 2006, **104**, 12157-12164.
- [3] P. F. Henry, M. T. Weller, C. C. Wilson, *J. Phys. Chem. B*, 2001, **105**, 7452-7458.
- [4] G. L. Marra, G. Artioli, A. N. Fitch, M. Milanesio, C. Lamberti, *Micropor. Mesopor. Mat.*, 2000, **40**, 85-94.
- [5] C. Lamberti, S. Bordiga, A. Zecchina, G. Artioli, G. Marra, G. Spano, *J. Am. Chem. Soc.*, 2001, **123**, 2204-2212.
- [6] J. D. Gale, *Solid State Sci.*, 2006, **8**, 234-240.
- [7] B. D. Montejovalencia, J. L. Salcedoperez, M. C. Curetarana, *J. Phys. Chem. C*, 2016, **120**, 2176-2186.
- [8] J. C. Dong, H. L. Zhu, Y. J. Xiang, Y. Wang, P. F. An, Y. Gong, Y. X. Liang, L. M. Qiu, A. G. Zheng, X. X. Peng, M. Lin, G. T. Xu, Z. Guo, D. Chen, *J. Phys. Chem. C*, 2016, **120**, 20114-20124.
- [9] T. Atoguchi, S. Yao, *J. Mol. Catal. A: Chem.*, 2003, **191**, 281-288.
- [10] Q. Qin, Y. Guo, H. Liu, J. Ma, J. Zhu, B. Wang, *Mol. Catal.*, 2023, **543**, 113147.
- [11] H. Liu, Q. Qin, J. Zhu, J. Ma, B. Wang, *ACS Appl. Mater. Inter.*, 2022, **14**, 9763-9780.
- [12] X. M. Cao, R. Burch, C. Hardacre, P. Hu, *Catal. Today*, 2011, **165**, 71-79.
- [13] Y. M. Choi, P. Liu, *J. Am. Chem. Soc.*, 2009, **131**, 13054-13061.
- [14] Y. Choi, P. Liu, *J. Am. Chem. Soc.*, 2009, **131**, 13054-13061.
- [15] Y. Zuo, M. Liu, T. Zhang, L. Hong, X. Guo, C. Song, Y. Chen, P. Zhu, C. Jayec, D. Fischer, *RSC Adv.*, 2015, **23**, 17897-17904.
- [16] X. M. Cao, R. Burch, C. Hardacre, P. Hu, *Catal. Today*, 2011, **165**, 71-79.
- [17] B. Zhao, R. Zhang, Z. Huang, B. Wang, *Appl. Catal. A-Gen.*, 2017, **546**, 111-121.
- [18] D. Liu, C. Zhong, *J. Phys. Chem. Lett.*, 2010, **1**, 97-101.
- [19] N. Feng, A. Zheng, S. Huang, H. Zhang, N. Yu, C. Yang, S. Liu, F. Deng, *J. Phys. Chem. C*, 2010, **114**, 15464-15472.
